# Supplementary material for: Dynamic Monolithic X-ray Imager with Enhanced Performance via Strain Relaxation in Metal-Halide Scintillator
Source: Research Square preprint supplement (doi:10.21203/rs.3.rs-3738471/v1), 2024-01-03
Supplement: Supplementary file 1 [file 88bd60a22709106dd555a107.docx]

**Dynamic Monolithic X-ray Imager with Enhanced Performance via Strain Relaxation in Metal-Halide Scintillator**

Chongrui Shu1,2,5, Caixin Zhang1,5, Ruihan Yuan1,*, Xixi Liu3, Shujie Tie1, Ning Yang1, Xuan Lian3, Jianguo Zhu2,*, Xiaojia Zheng1,4,*

1Institute of Chemical Materials, China Academy of Engineering Physics, Mianyang 621900, Sichuan, China

2 Department of Materials Science, Sichuan University, Chengdu 610064, China

3 SensView Technology Co., Ltd., Chengdu 610299, China

4 Sichuan Research Center of New Materials, Chengdu 610200, China

5 These authors contributed equally: Chongrui Shu, Caixin Zhang.

*E-mail: xiaojia@caep.cn, yuanruihan17@gscaep.ac.cn, nic0400@scu.edu.cn

KEYWORDS: X-ray imaging, strain, metal-halide, resolution, stability

**Experimental Section**

**Calculation of light yield:** To calculate the light yield of Cs5Cu3Cl6I2, the commercial scintillator LYSO with known light yield of 33000 photons MeV-1 was used as the reference.37,42 LYSO crystal and Cs5Cu3Cl6I2 film of same size and thickness were placed on the integrating sphere of the Oceanview system, respectively. By comparing the integrated intensity of the RL peak, the light yield of Cs5Cu3Cl6I2 scintillator can be obtained by the following equation:43

(4)

where *η* represents the X-ray deposited energy percentage of scintillators, *S* means the radiation area, and *I* is the RL intensity at different wavelengths (*λ*). Here, the thickness of LYSO, grinded-, and SAC-Cs5Cu3Cl6I2 @PDMS film are 370 μm, respectively. It should be noted that the calculation of light yield is approximate due to the absence of explicit calibration for the light yield of LSYO.

**Calculation of Modulation Transfer Function (MTF):** The Modulation Transfer function (MTF) is a crucial index to evaluate the spatial resolution performance of imaging system, which represents the transmission capability of the spatial frequency input signal modulation. In this work, the MTF was calculated by the slanted-edge method. Sharp edge X-ray imaging was obtained on the standard tungsten plate. MTF operation on images was processed with software Image J. Then the edge spread function (ESF(x)) was derived from the edge image. The line spread function LSF(x) was the derivation of the ESF(x) and the MTF(ν) was the Fourier transform of LSF(x). In summary, the MTF curves can be calculated by the following equation:

(5)

where ν represents the spatial frequency and x means the position of the pixels. The spatial resolution of the scintillator can be evaluated when the MTF value decreases to 0.2.

**Calculation of the mean energy for the continuum bremsstrahlung X-ray spectrum.** The mean energy for the continuum bremsstrahlung X-ray spectrum can be determined using the following equation：

(6)

is the distribution probability of X-rays with the energy of *E*.

(7)

where and are the distribution probability and the energy bin width of the X-rays at the energy bin. For a 45 kV tube voltage in an LDR tube, the mean energy is determined to be 13.5 keV.


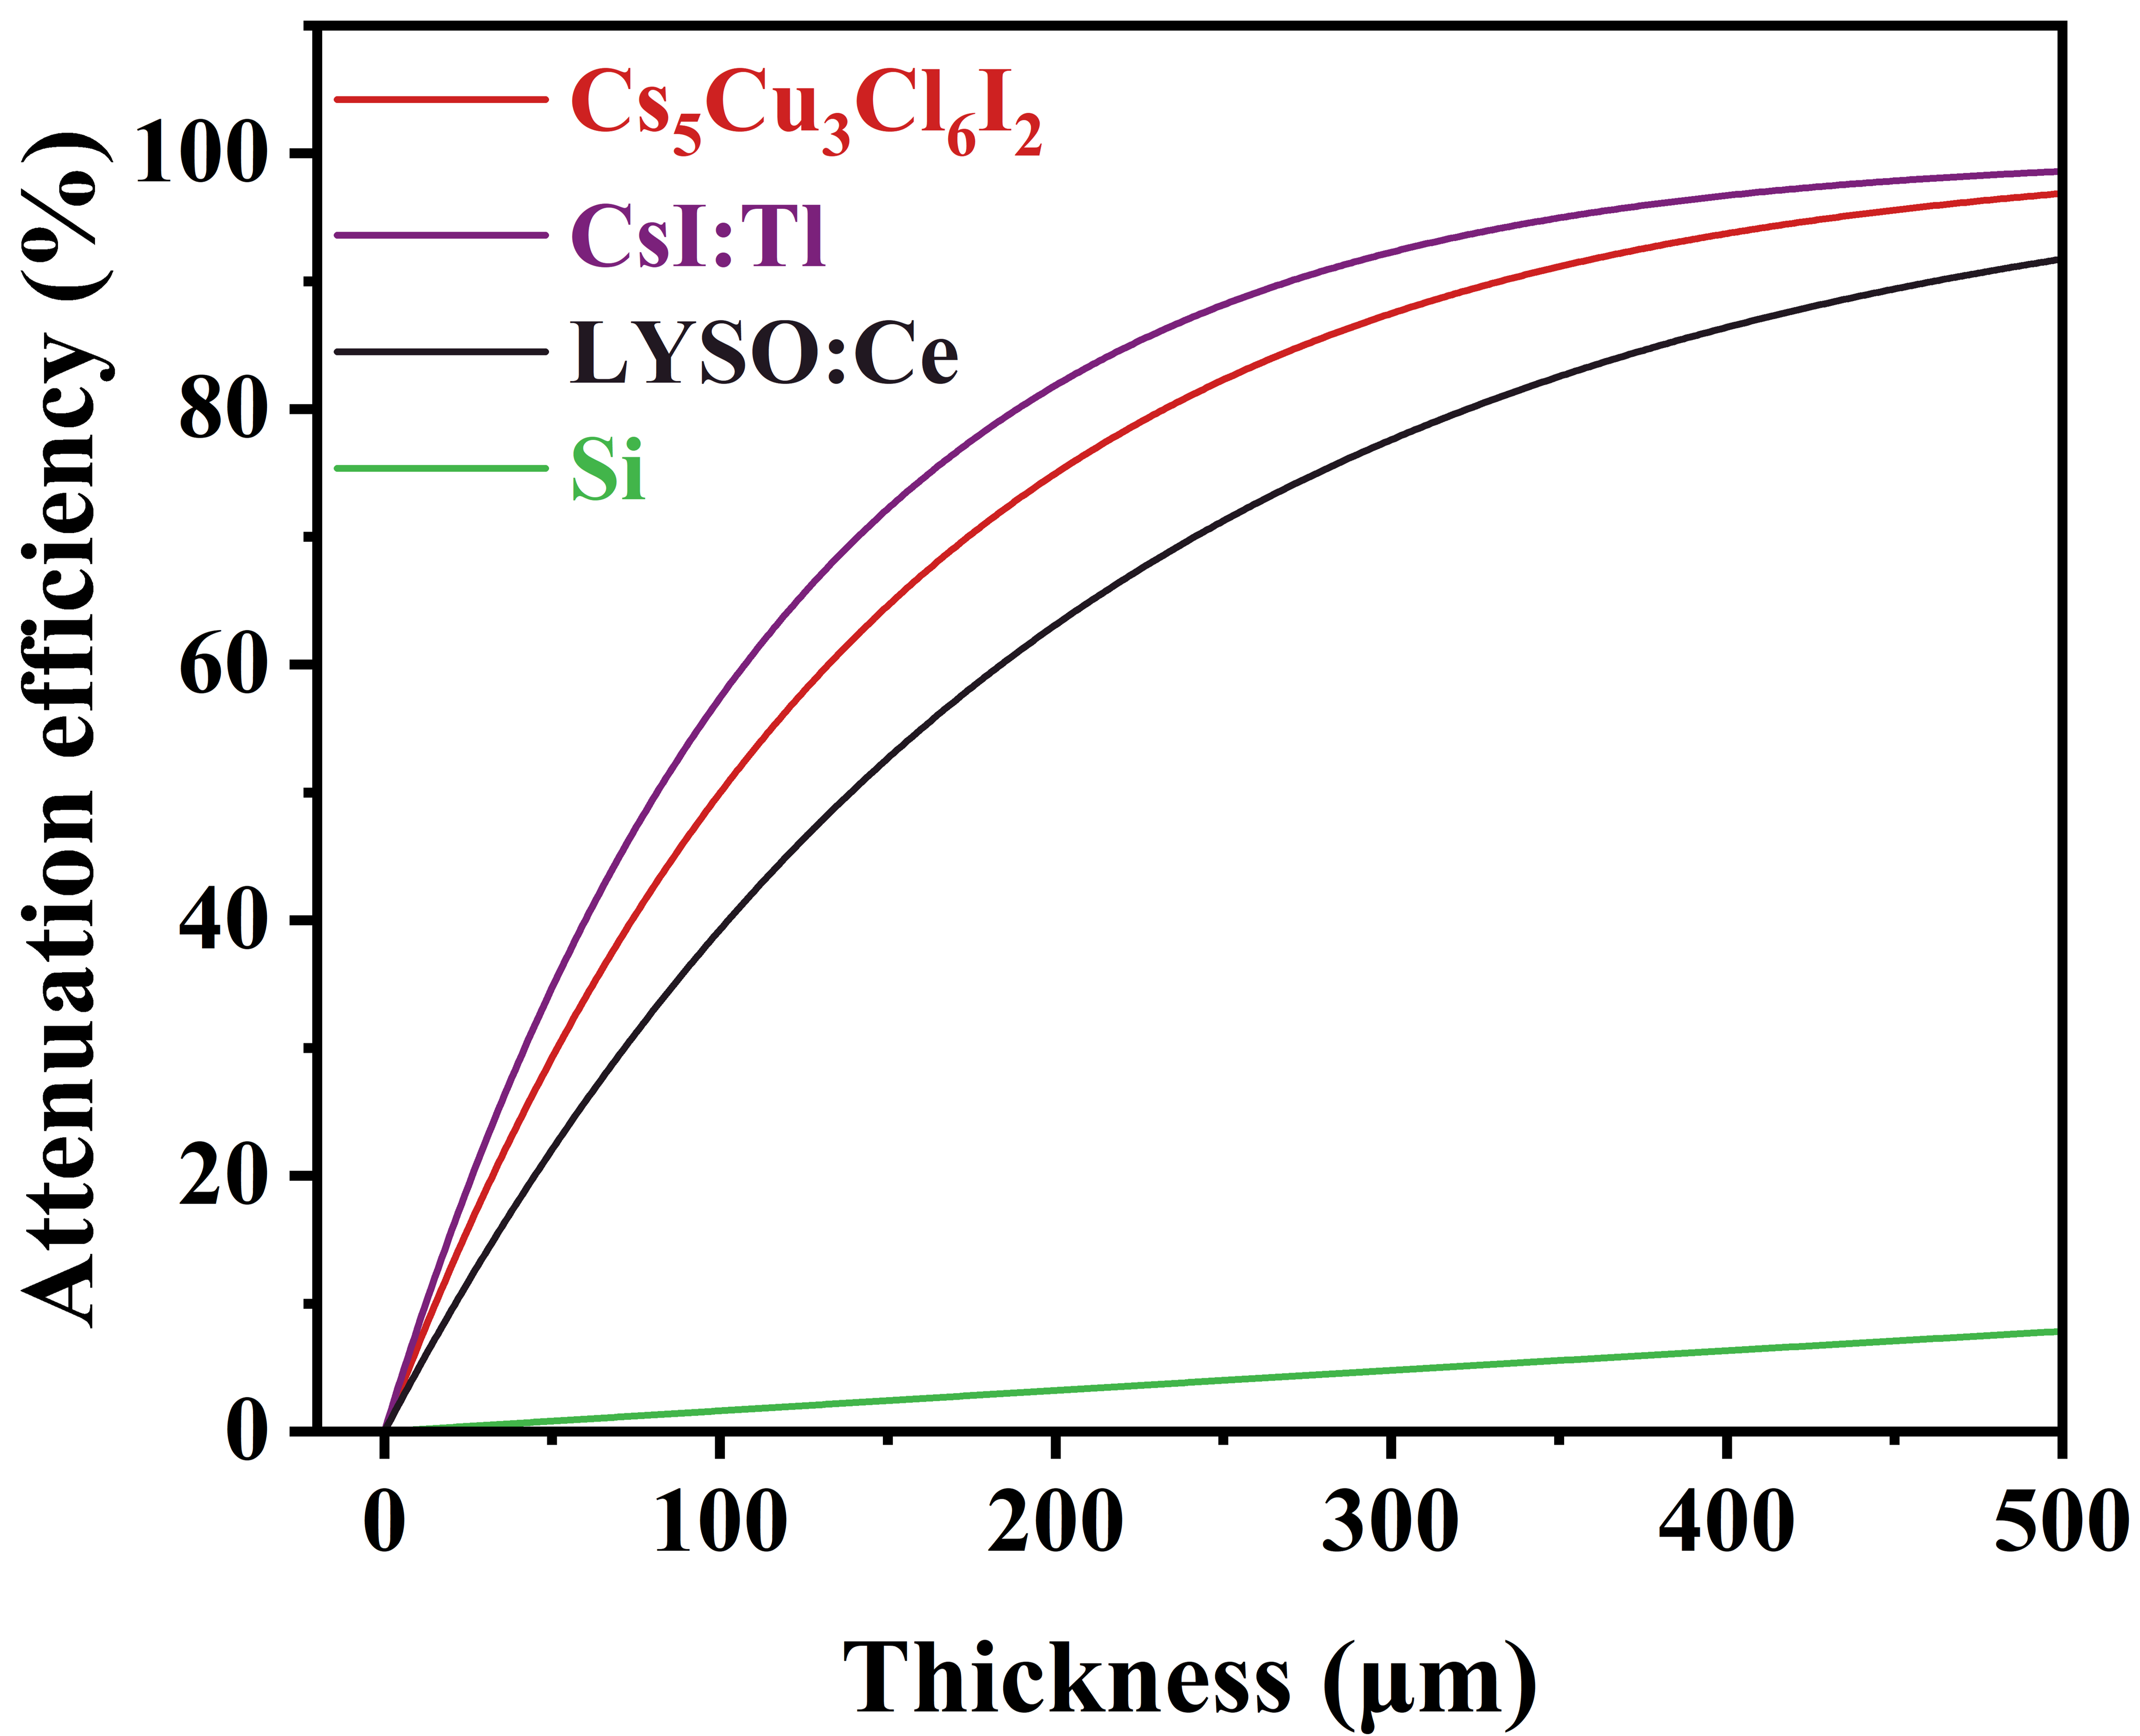


**Figure S1.** Thickness-dependent attenuation efficiencies of Cs5Cu3Cl6I2, CsI:Tl, LYSO:Ce, and Si to 40 KeV X-ray photons. The X-ray attenuation efficiency (AE) could be obtained from XCOM database of National Institute of Standards and Technology. At same thickness, the X-ray attenuation efficiency of Cs5Cu3Cl6I2 is close to commercial scintillators (CsI:Tl and LYSO:Ce), superior than Si, indicating significant application prospects of Cs5Cu3Cl6I2 in X-ray detection.


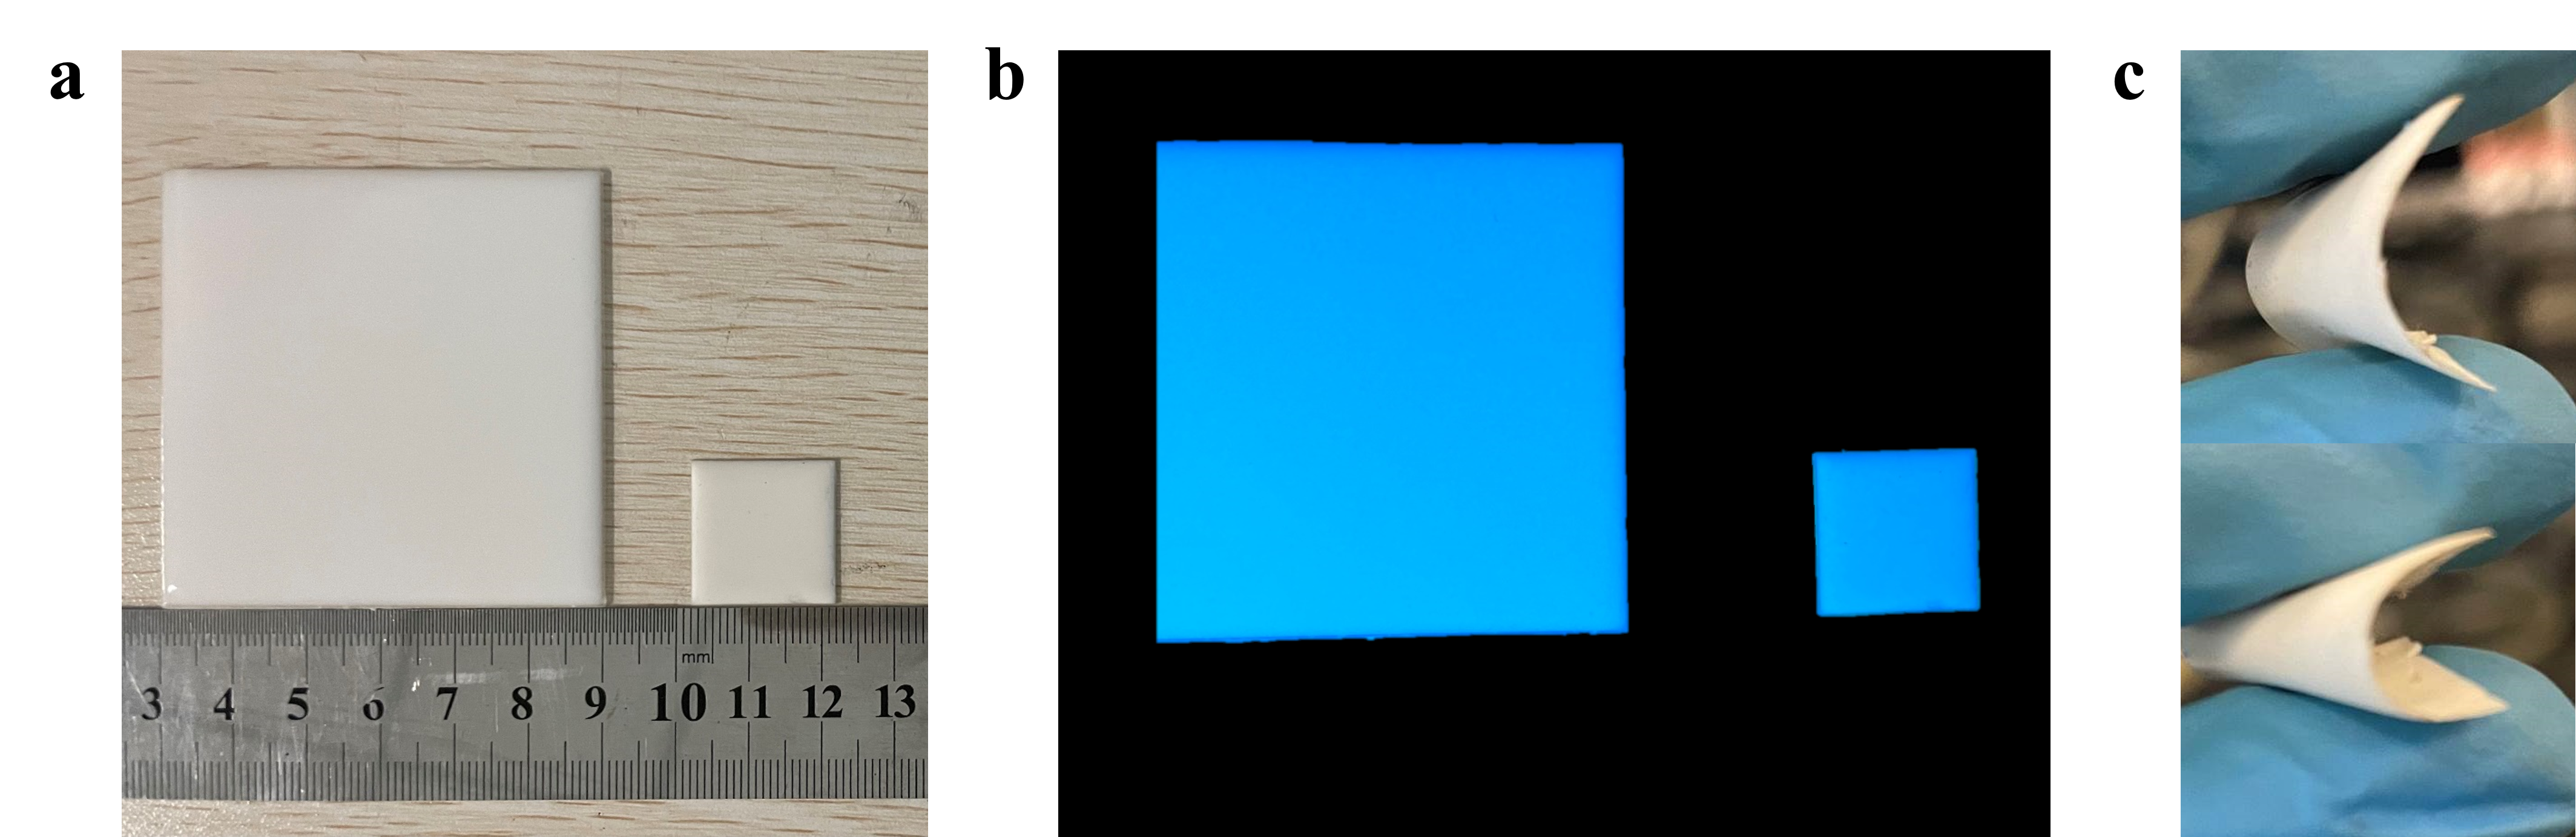


**Figure S2.** Photographs of(a) Cs5Cu3Cl6I2@PDMS films, (b) blue emission of the films under X-rays, and (c) flexible features of the films. Cs5Cu3Cl6I2@PDMS films could be prepared by blade-coating easily. The thickness and area of the films could be controlled by the height of the blade and the substrate size, respectively. Under X-rays, the Cs5Cu3Cl6I2@PDMS films exhibited excellent blue-emitting properties. Besides, it was a flexible film which could be bent at will without any damages, which are likely to be a commercial scintillator film in the future.

**
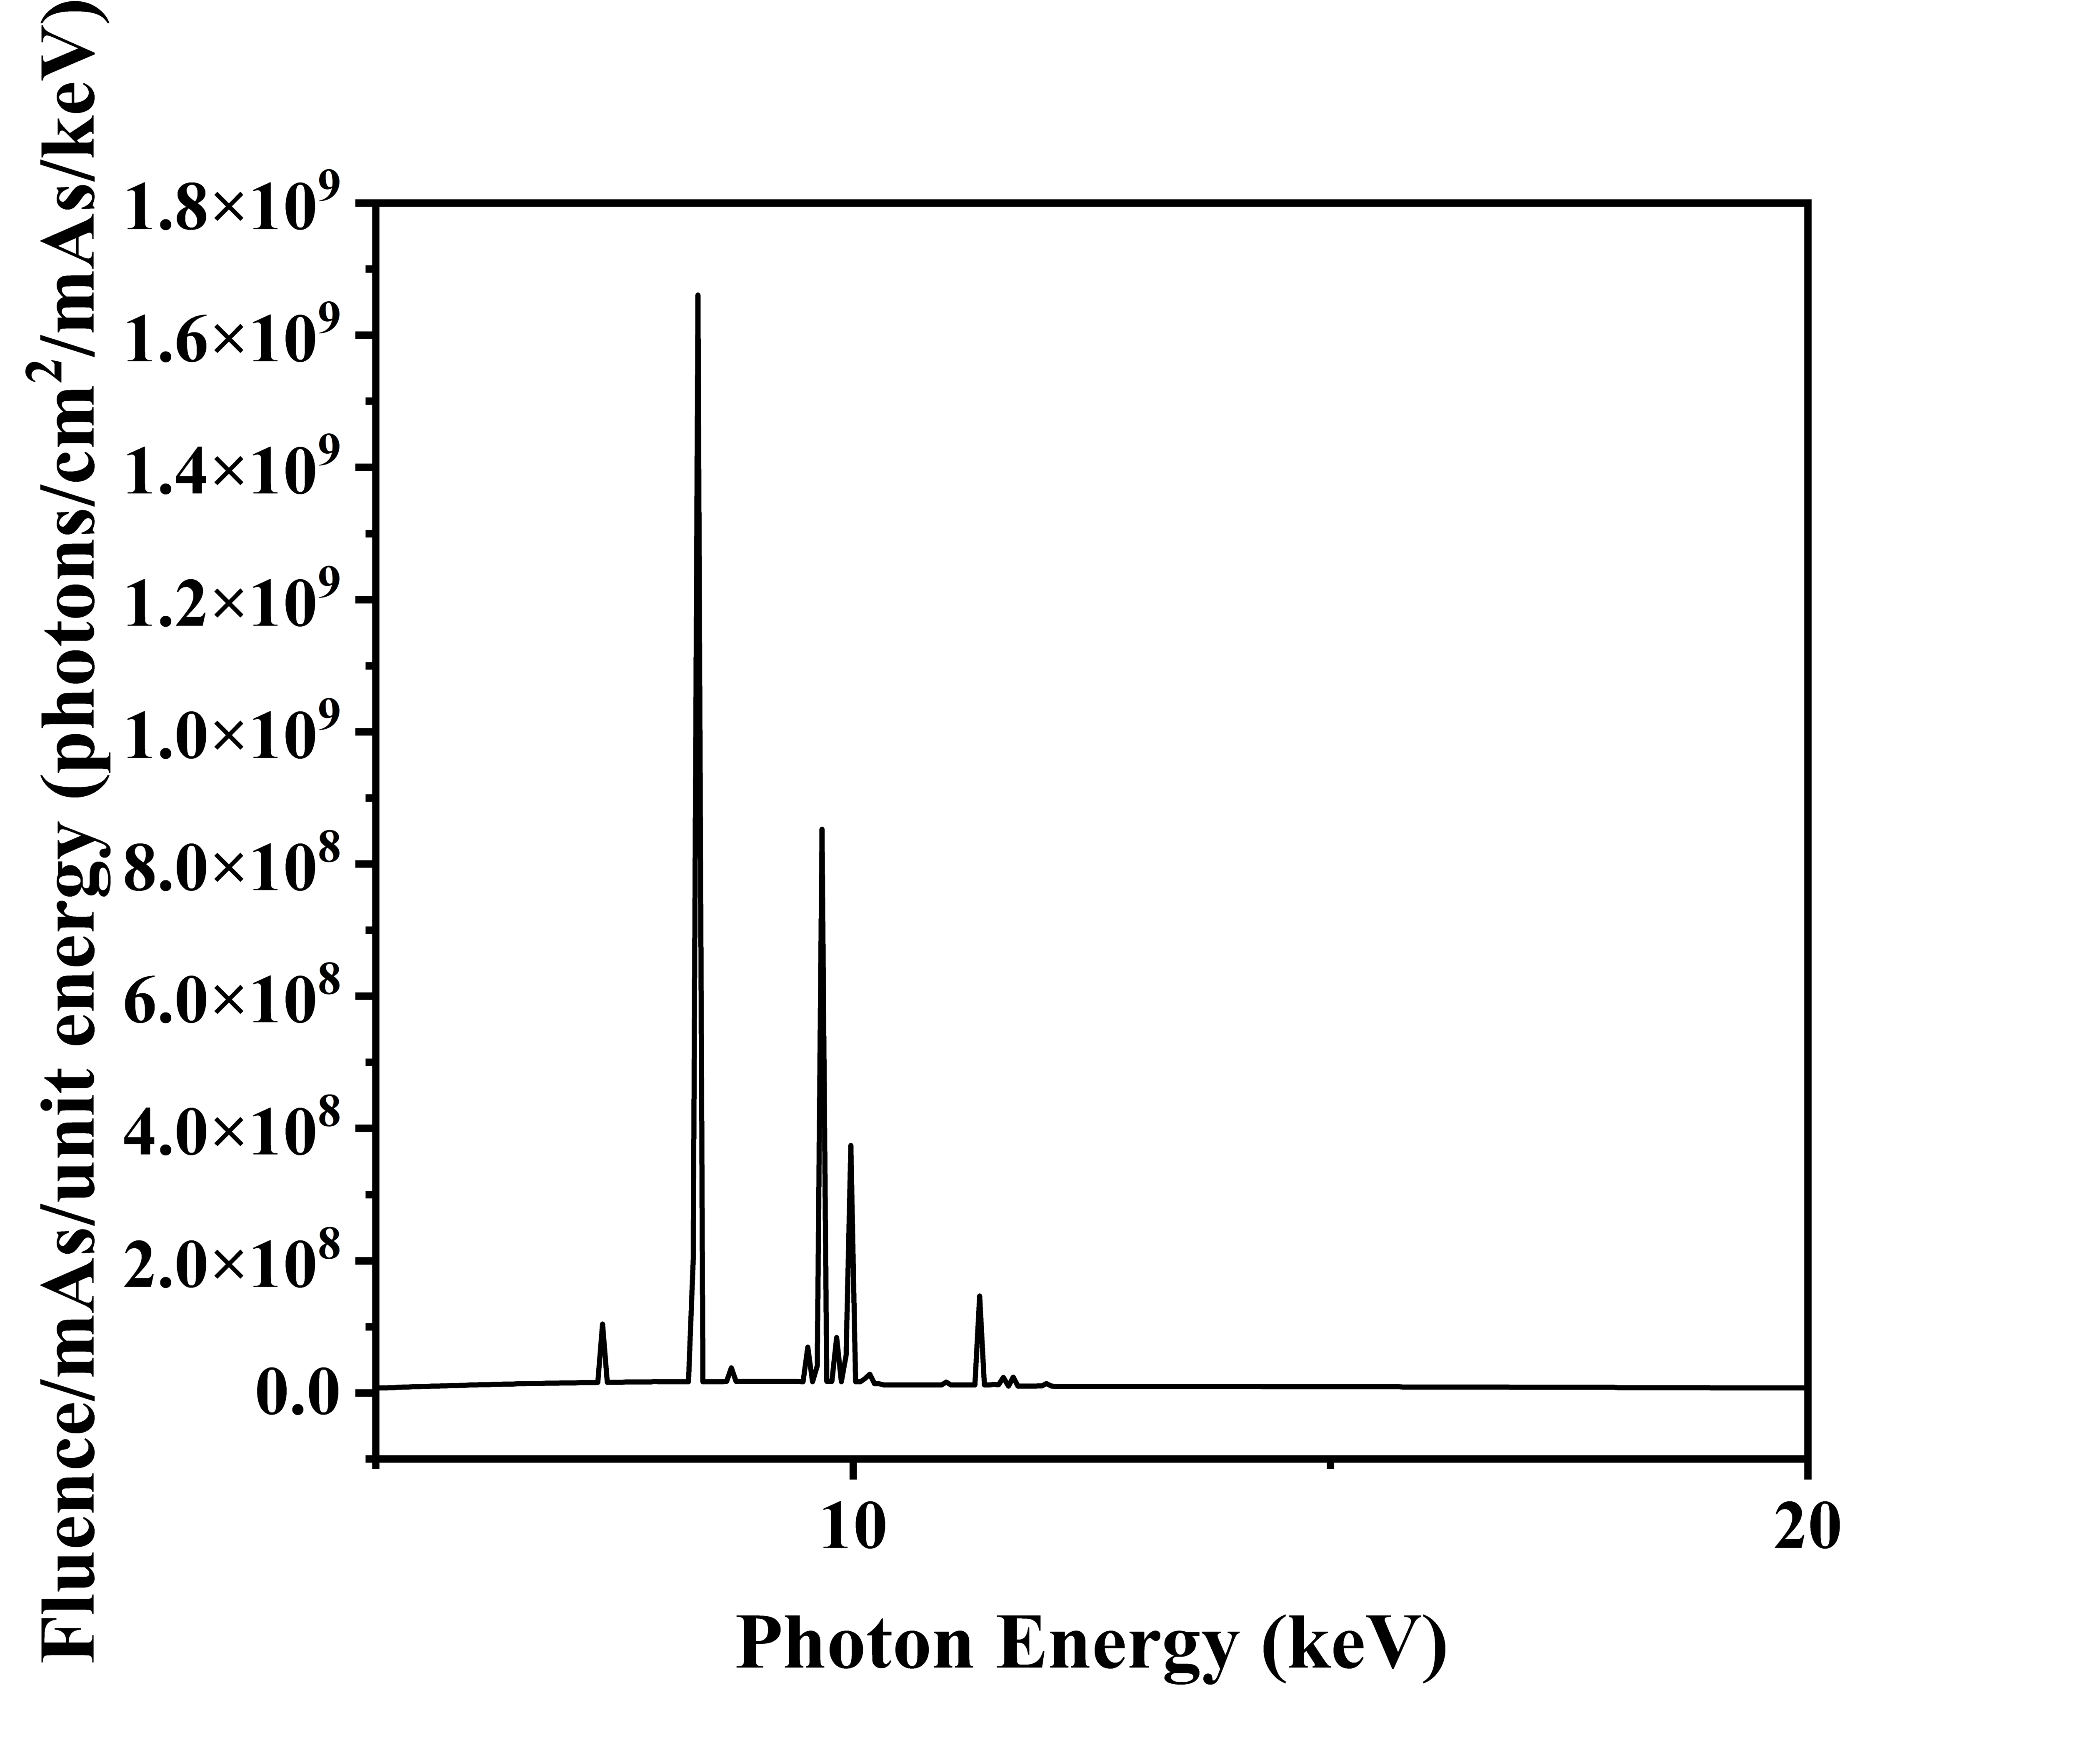
**

**Figure S3.** Calculated X-ray spectrum under a bias voltage of 45 kV. The mean energy of X-rays is 13.5 keV in our experiment.


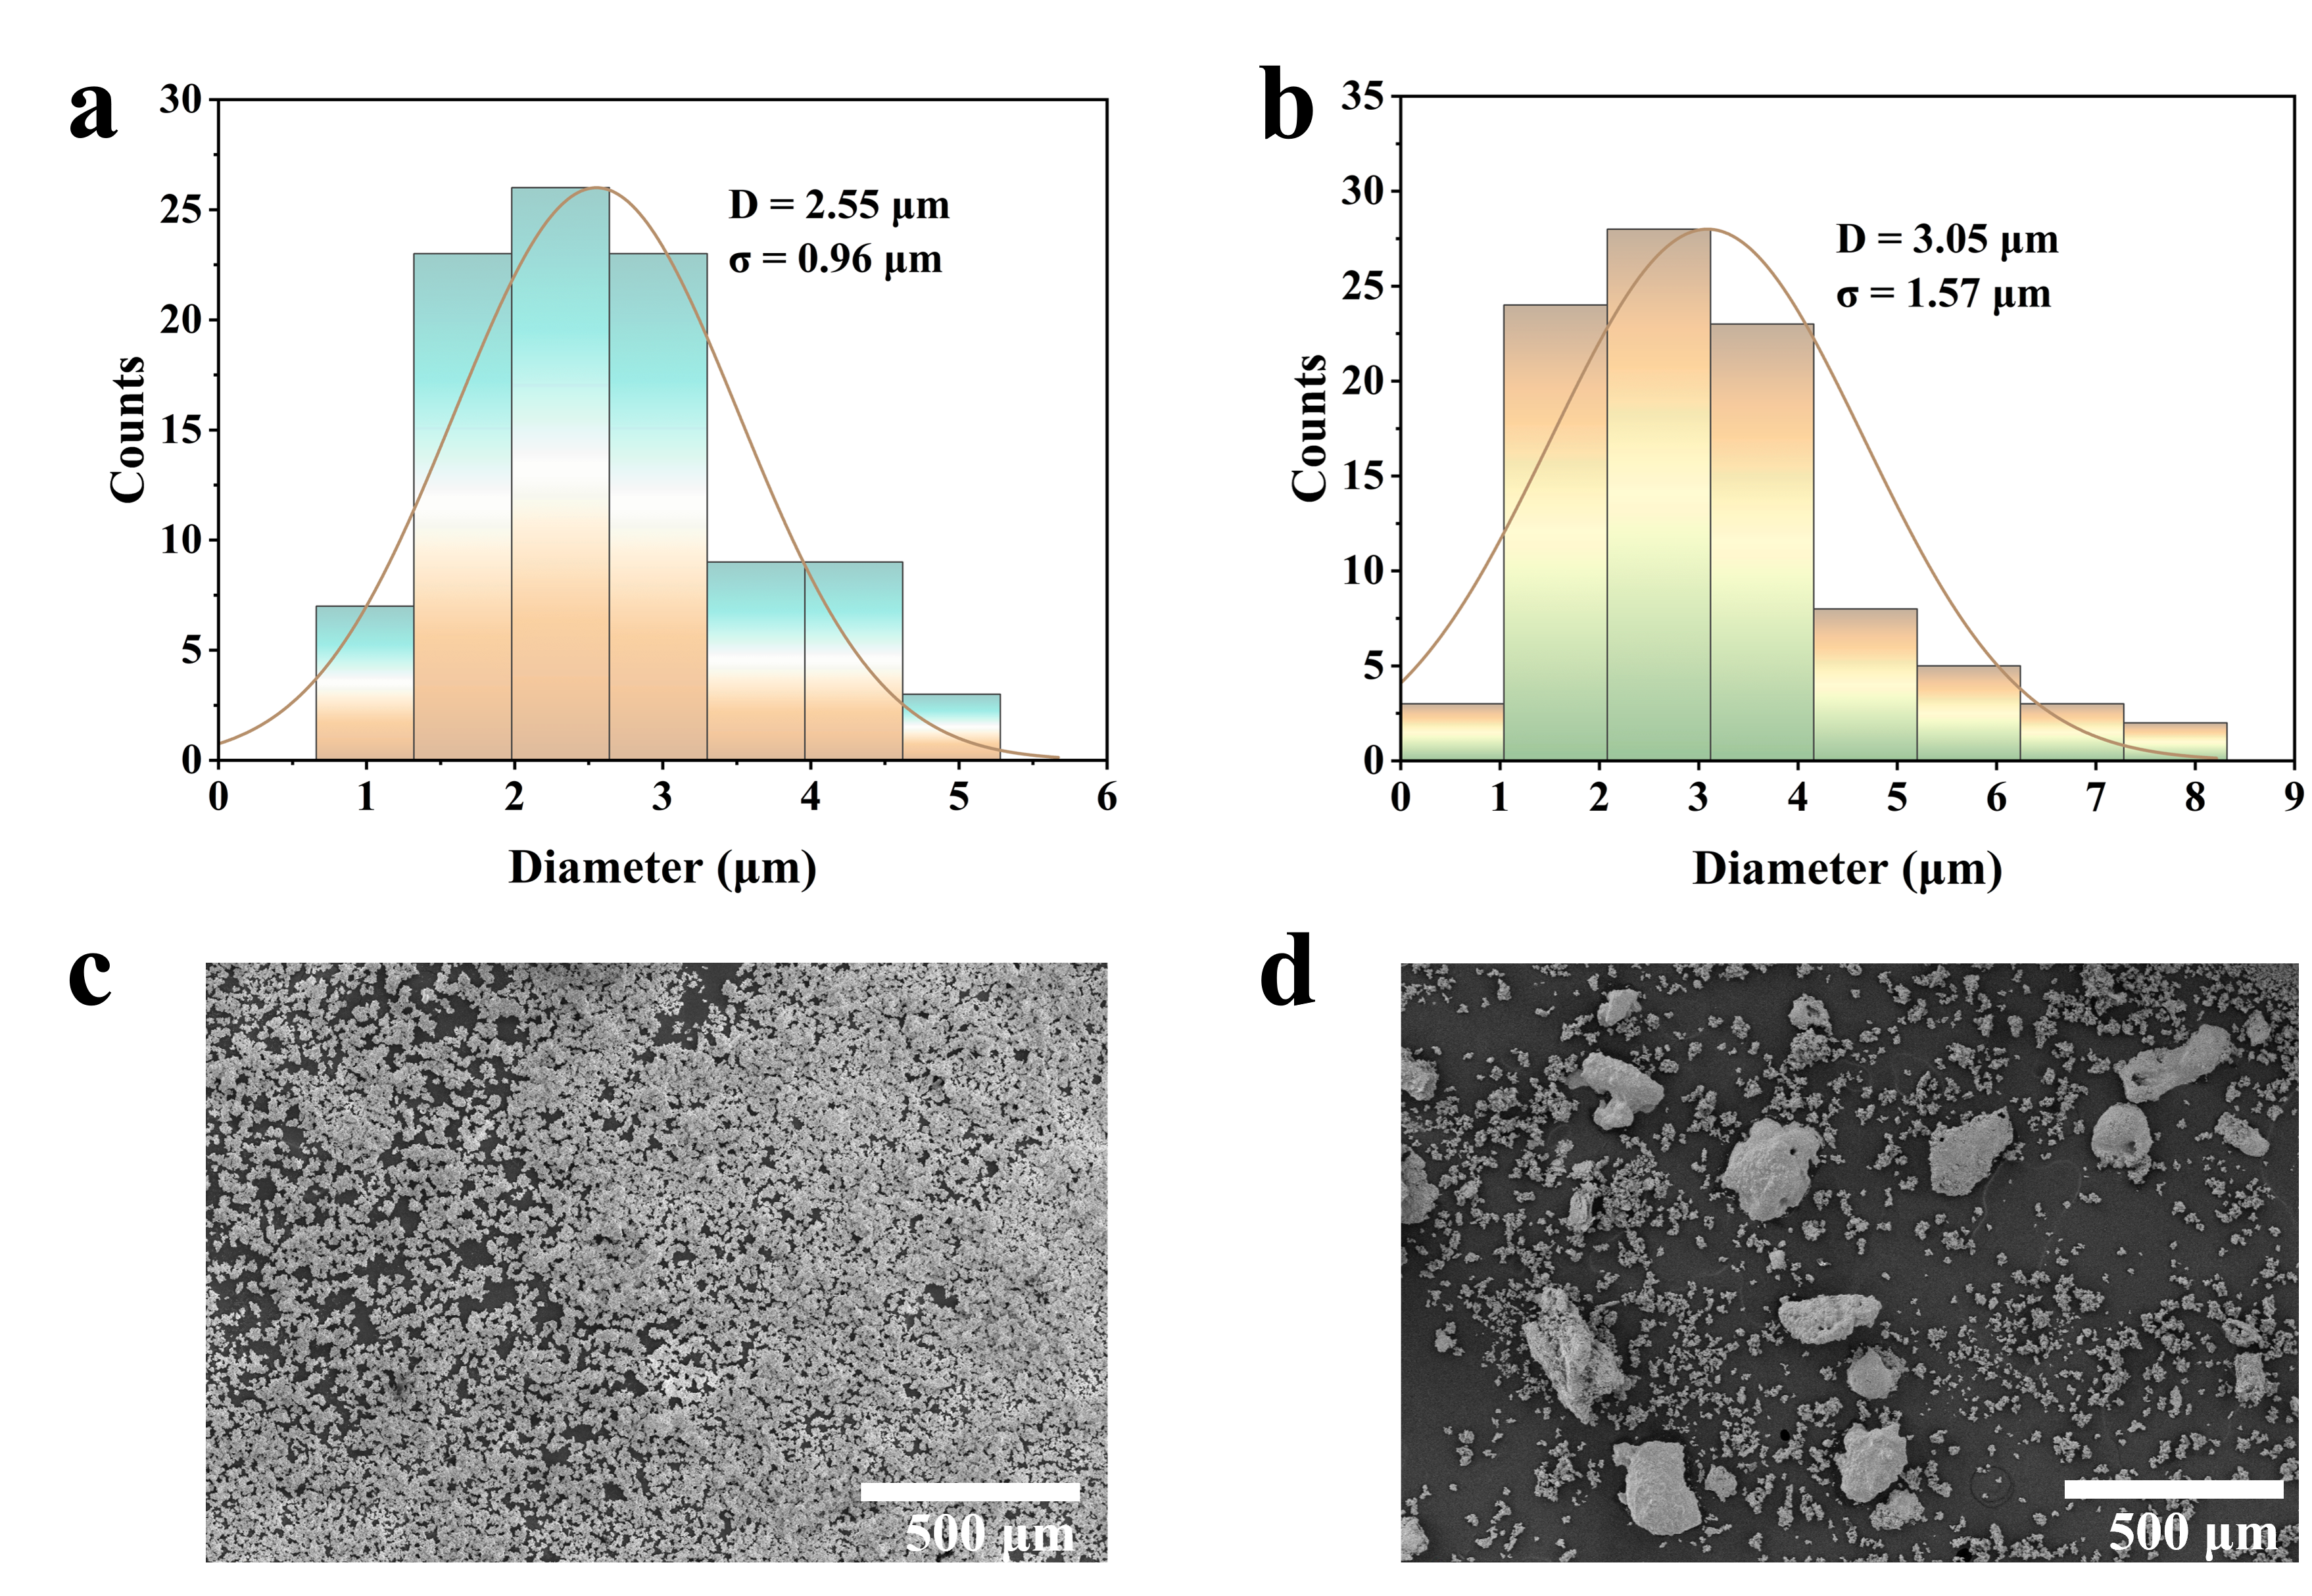


**Figure S4.** Size distribution of (a) SAC- and (b) grinded-Cs5Cu3Cl6I2 bulk powder extracted from the surface SEM images in Figure 1b, c. About 100 different grains were counted to form this chart. The fitting curve of grain size generally presented a positive distribution trend. The average grain size and standard deviation of SAC-Cs5Cu3Cl6I2 (D = 2.55 μm, σ = 0.96 μm) were smaller than the grinded one (D = 3.05 μm, σ = 1.57 μm); The surface SEM images of (c) SAC-and (d) grinded-Cs5Cu3Cl6I2 bulk powder. Apparently, large heterogeneous particles were discovered in grinded Cs5Cu3Cl6I2, while these were not found in SAC-Cs5Cu3Cl6I2. The large heterogeneous particles were likely to be the raw materials that have not completely reacted, which may be related to its poor scintillation property and stability. This result reveals the advantage of Cs5Cu3Cl6I2 preparing by solution-assisted crystallization method, which can mix the ingredients more thoroughly.


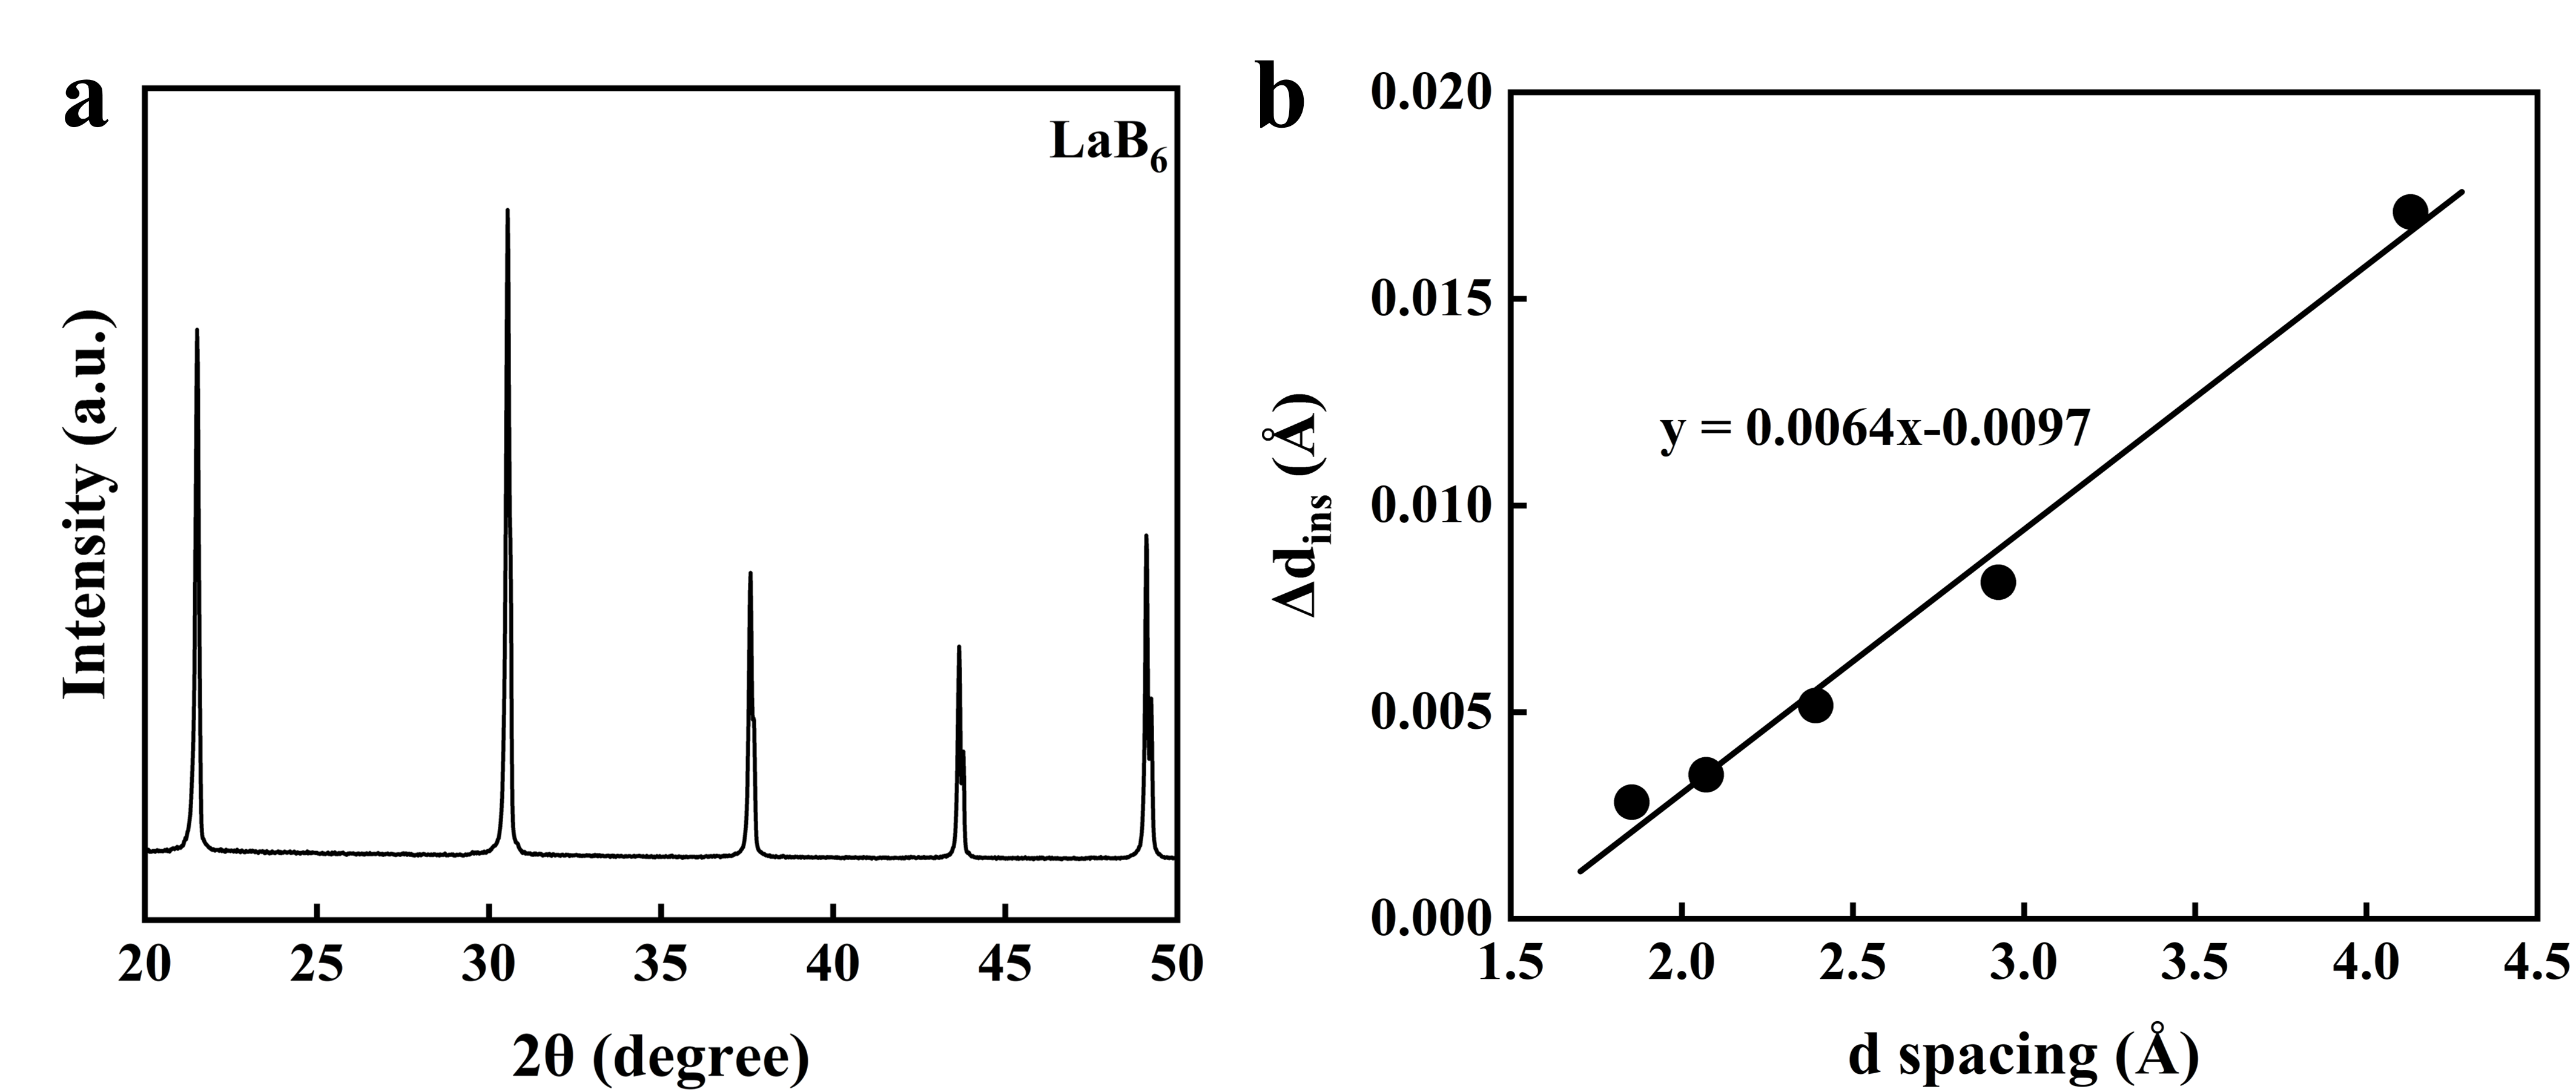


**Figure S5.** (a) XRD pattern of LaB6; (b) Δ*d*inst versus *d* spacing extracted from the XRD results. Here, LaB6 was selected as a standard sample because of its standard XRD pattern and line fitting, with a view to calibrating the influence of instrument (Δ*d*inst).


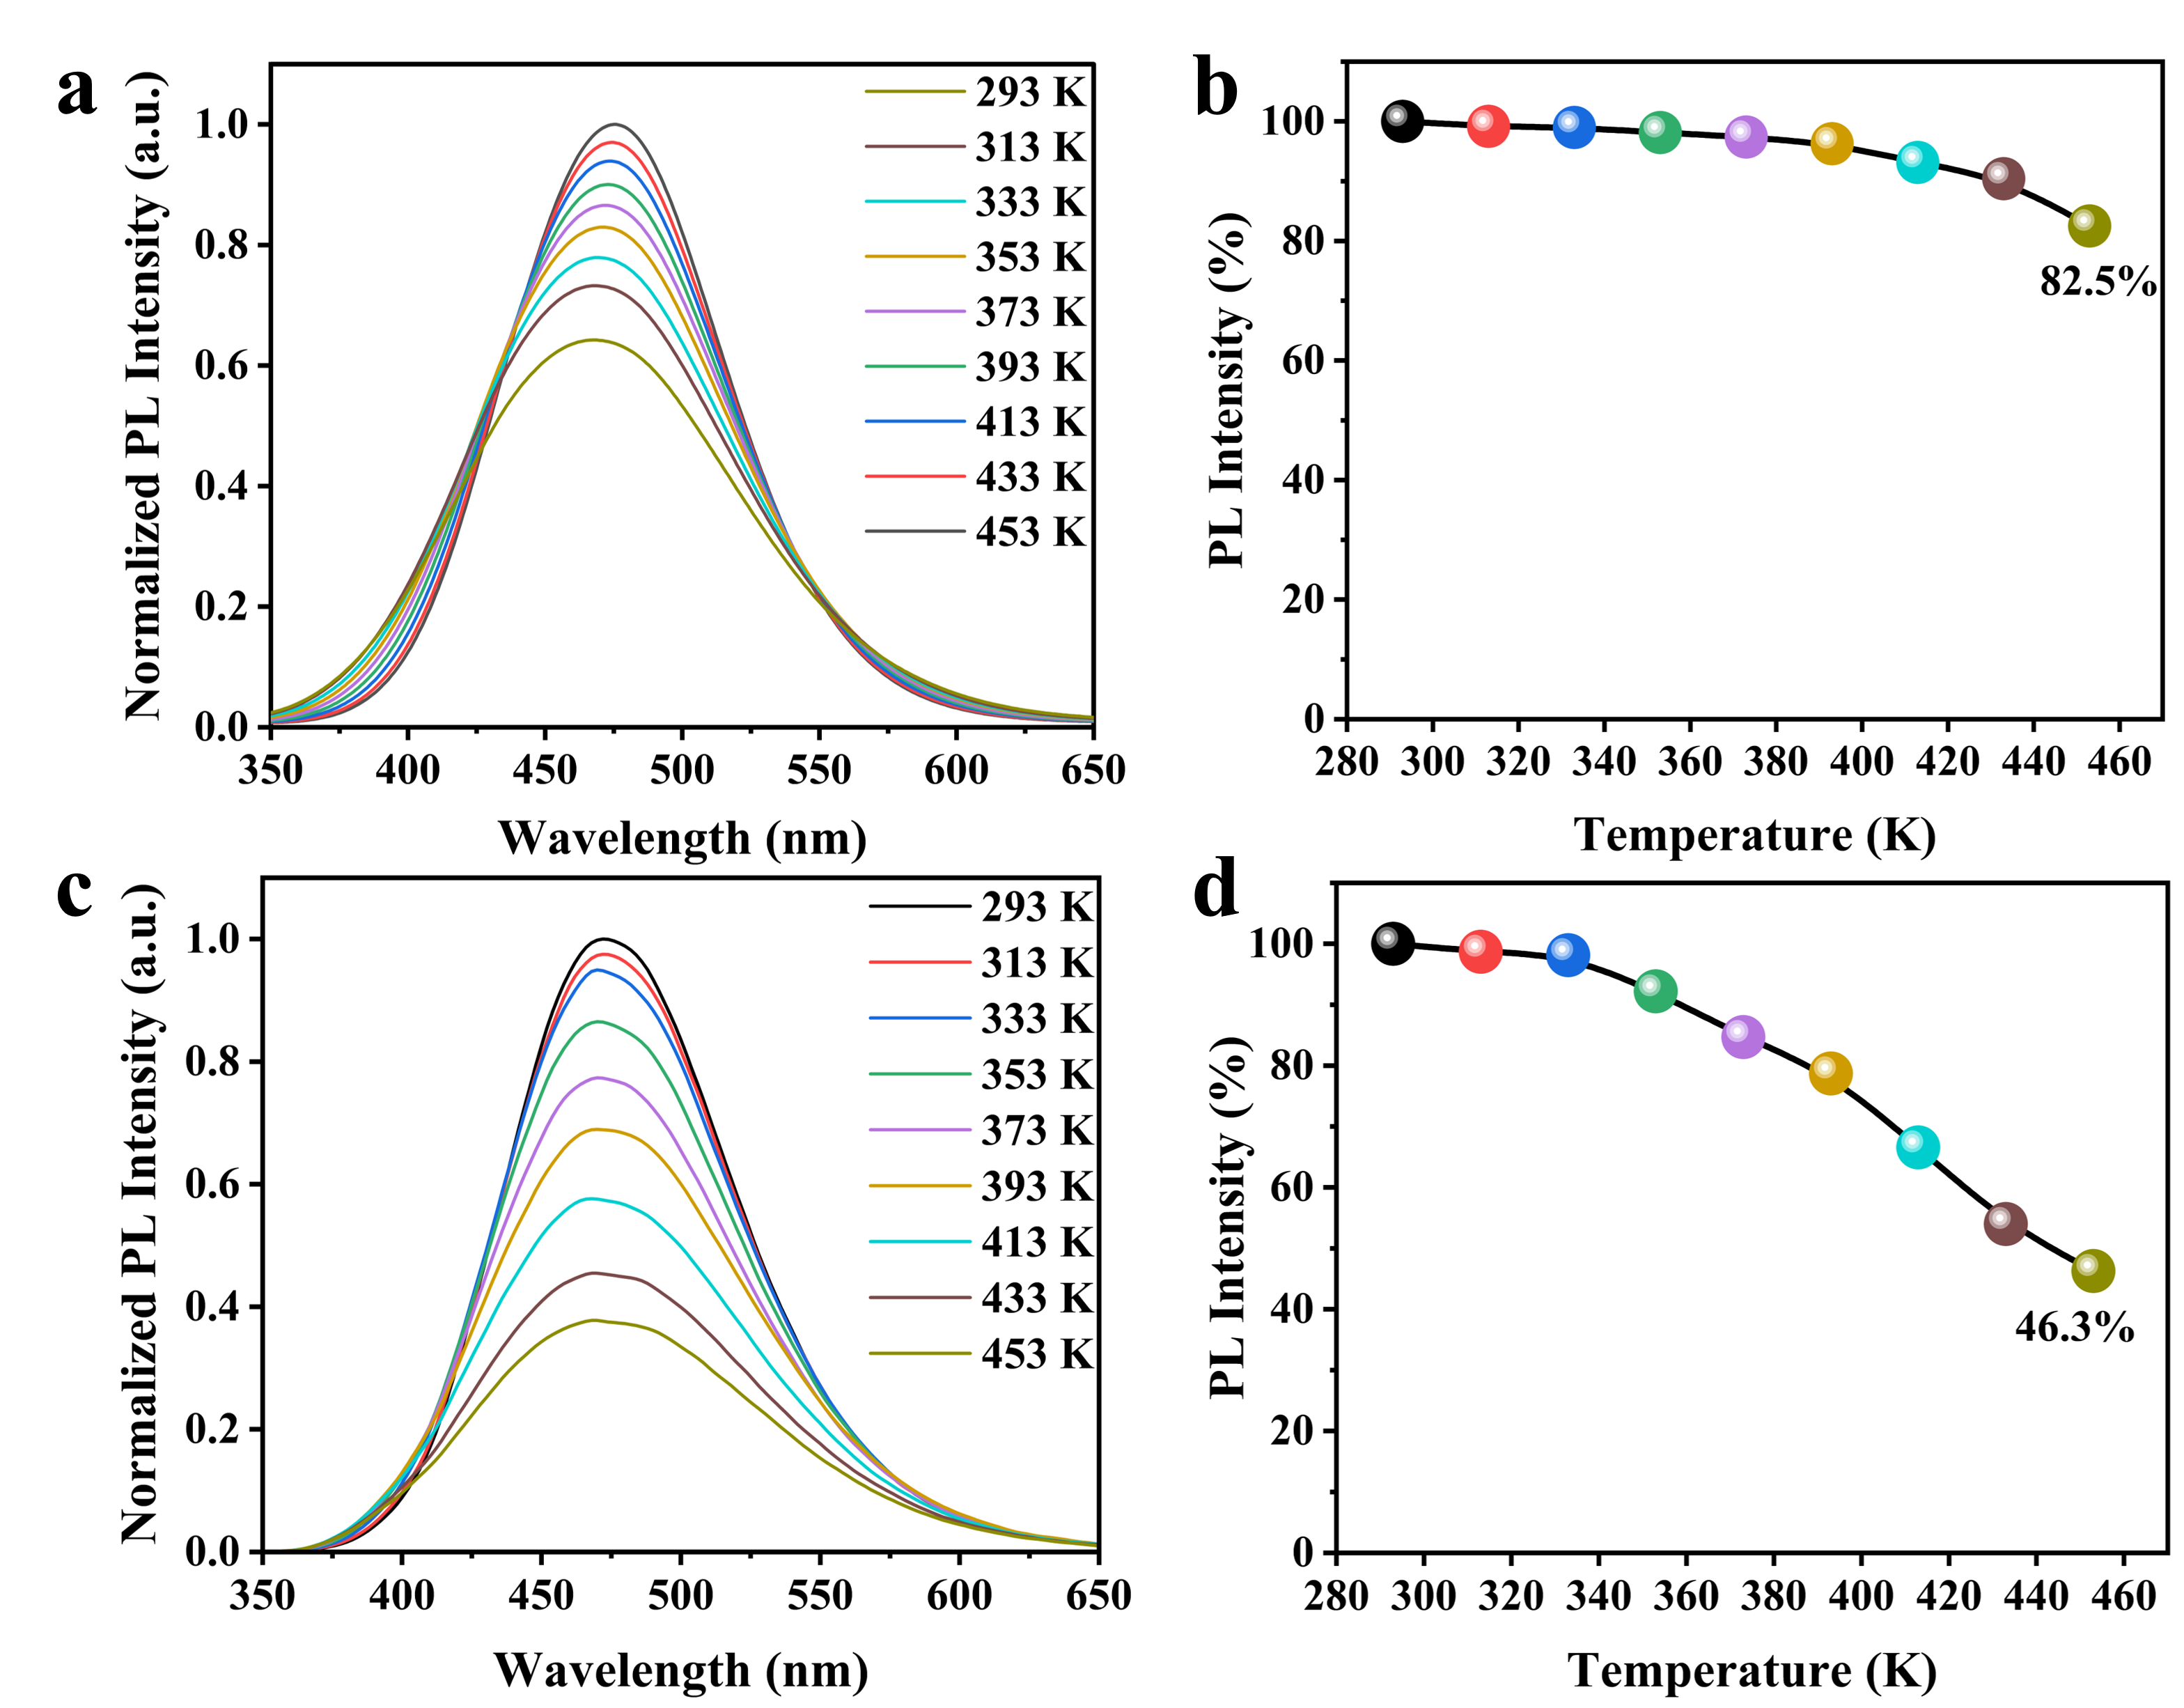


**Figure S6.** (a-b) The temperature-dependentPL spectra and corresponding PL emission intensity of SAC-Cs5Cu3Cl6I2; (c-d) The temperature-dependent PL spectra and corresponding PL emission intensity of grinded-Cs5Cu3Cl6I2. The temperature was set from 293 K to 453 K, we recorded the data once every 20 K. With the temperature rising, there was gentle tendency of SAC-Cs5Cu3Cl6I2 before 393 K, and 82.5% of PL emission intensity was retained under a high temperature of 453 K. While the PL intensity of grinded-Cs5Cu3Cl6I2 decreased drastically after 333 K which can kept 46.3% of PL emission intensity under 453 K. These results indicate a superior scintillation property of SAC-Cs5Cu3Cl6I2 against heat.


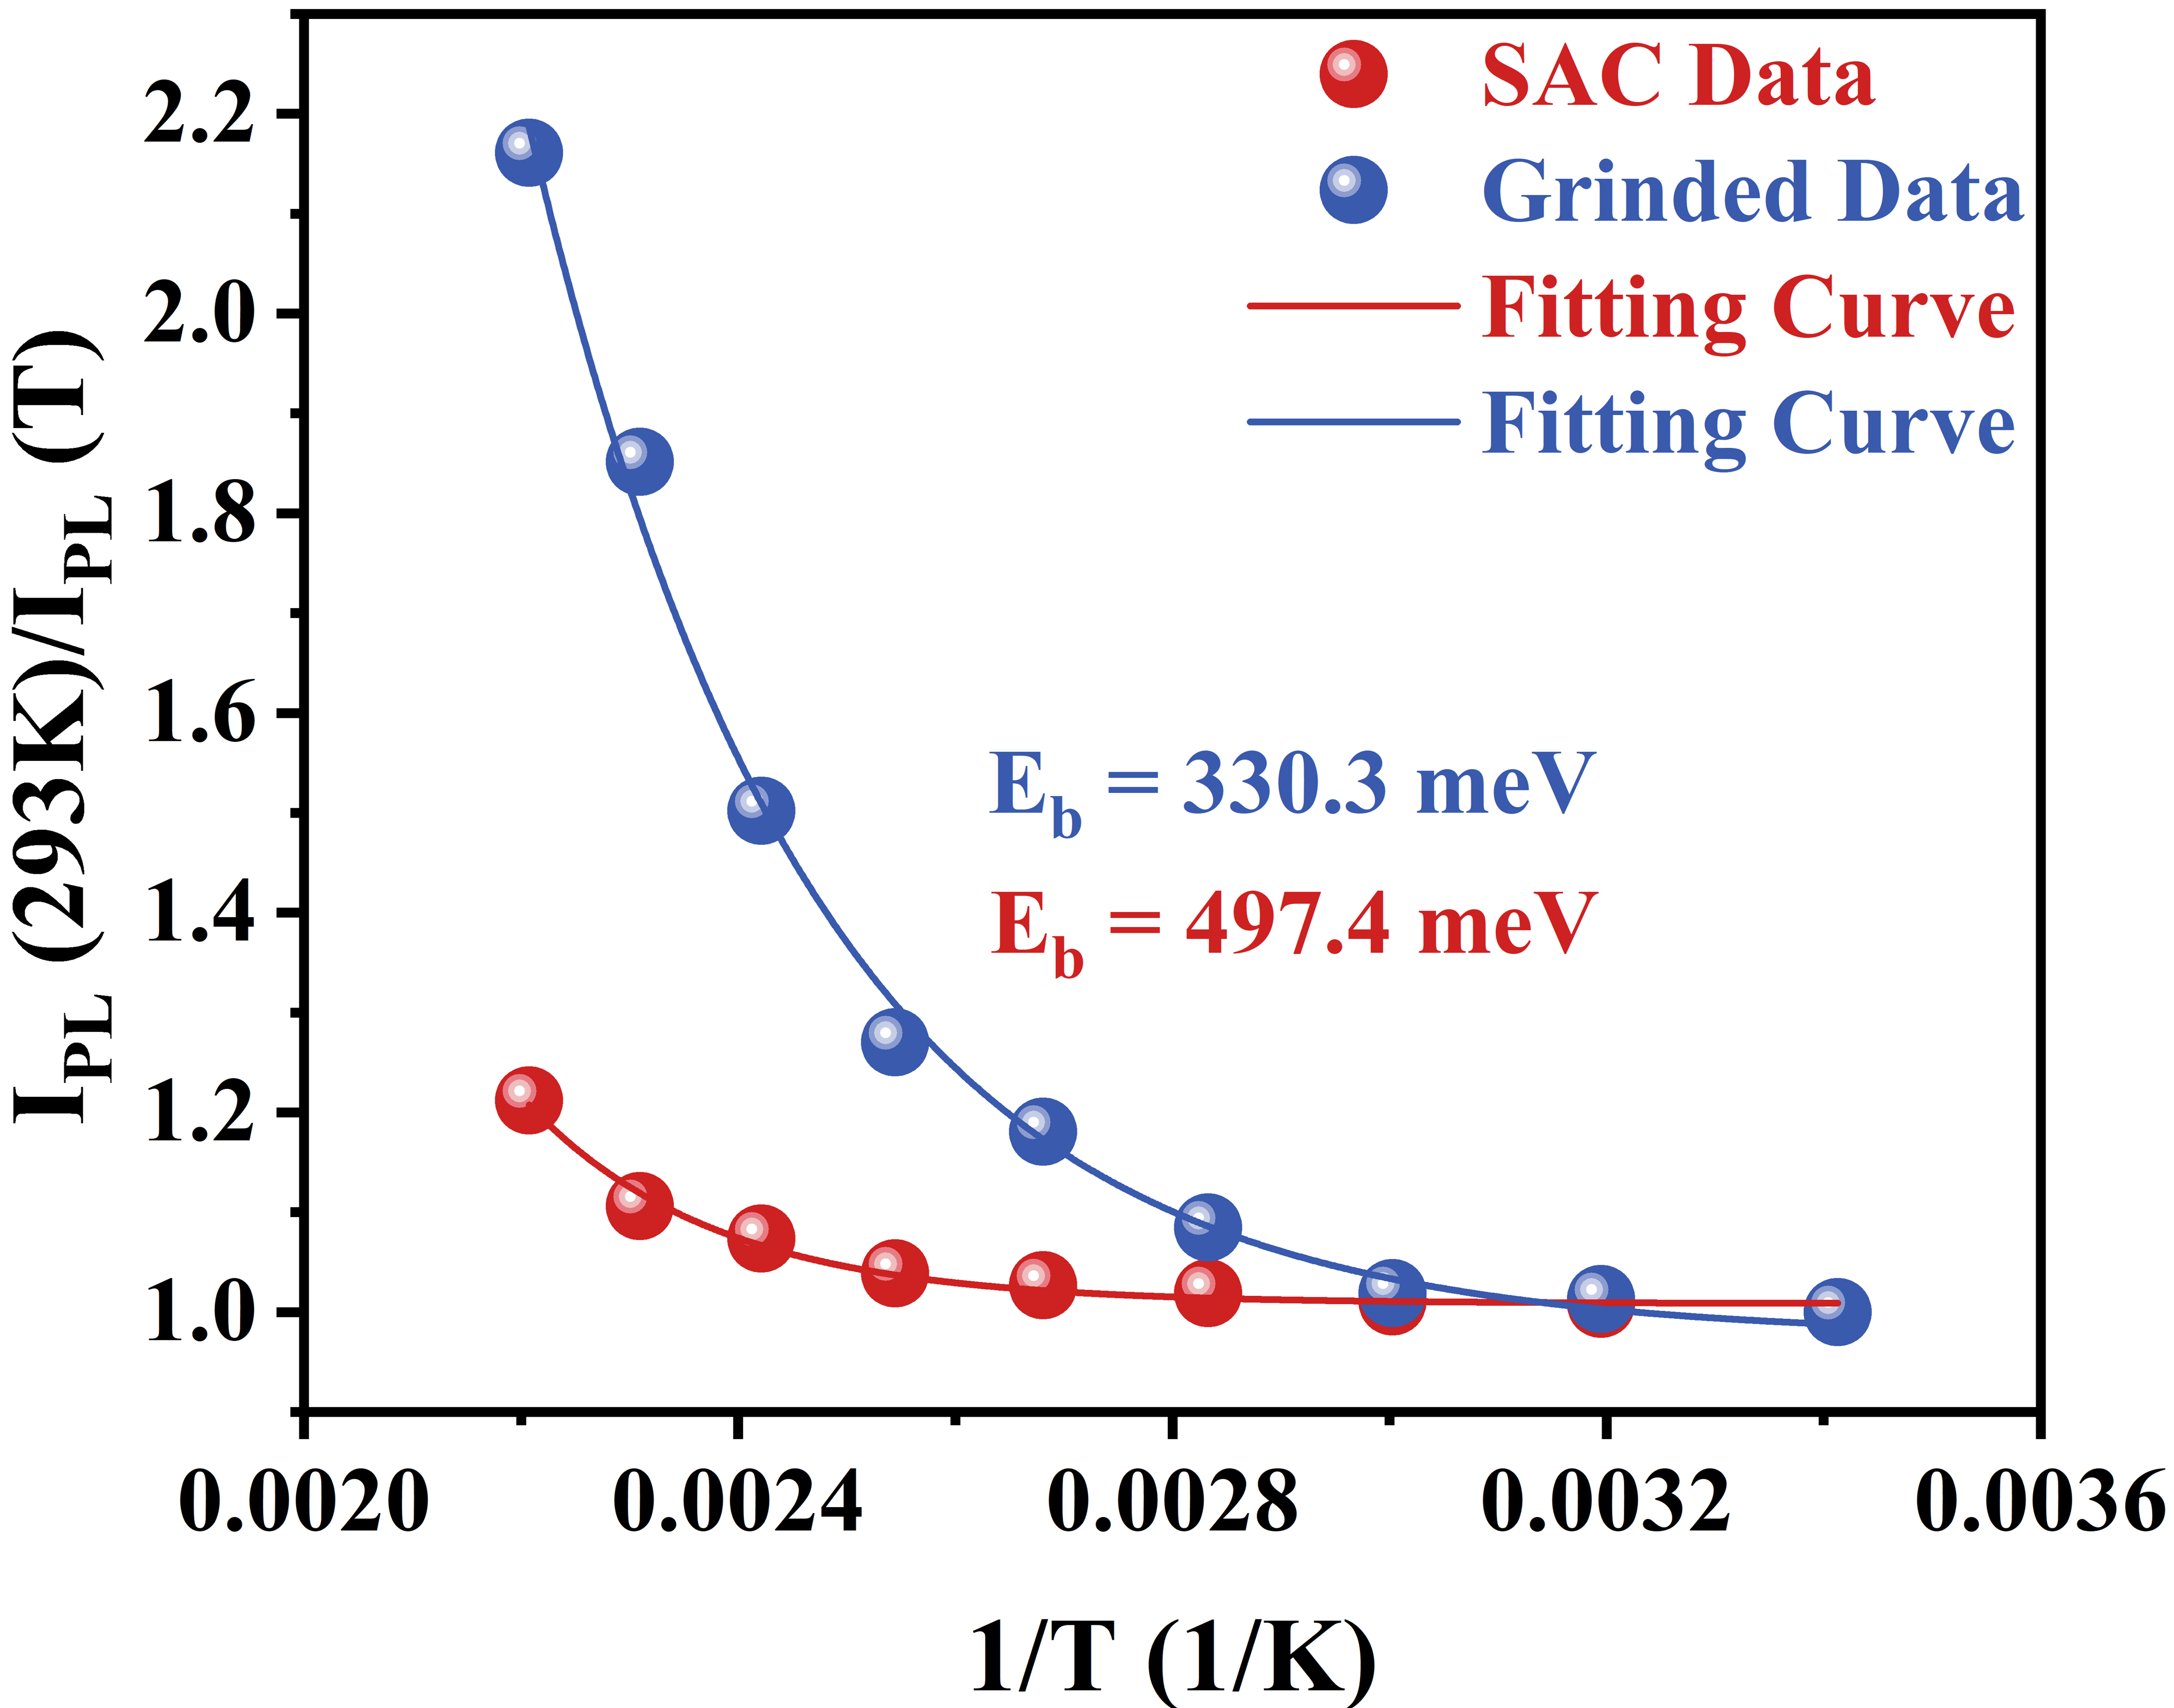


**Figure S7.** Temperature-dependent PL intensity of the scintillator. The exciton binding energy (*E*b) for SAC- and grinded-Cs5Cu3Cl6I2 was derived to be 497.4 and 330.3 meV using equation (3) in the main text, respectively. The higher *E*b of SAC-Cs5Cu3Cl6I2 indicates a superior thermal stability.


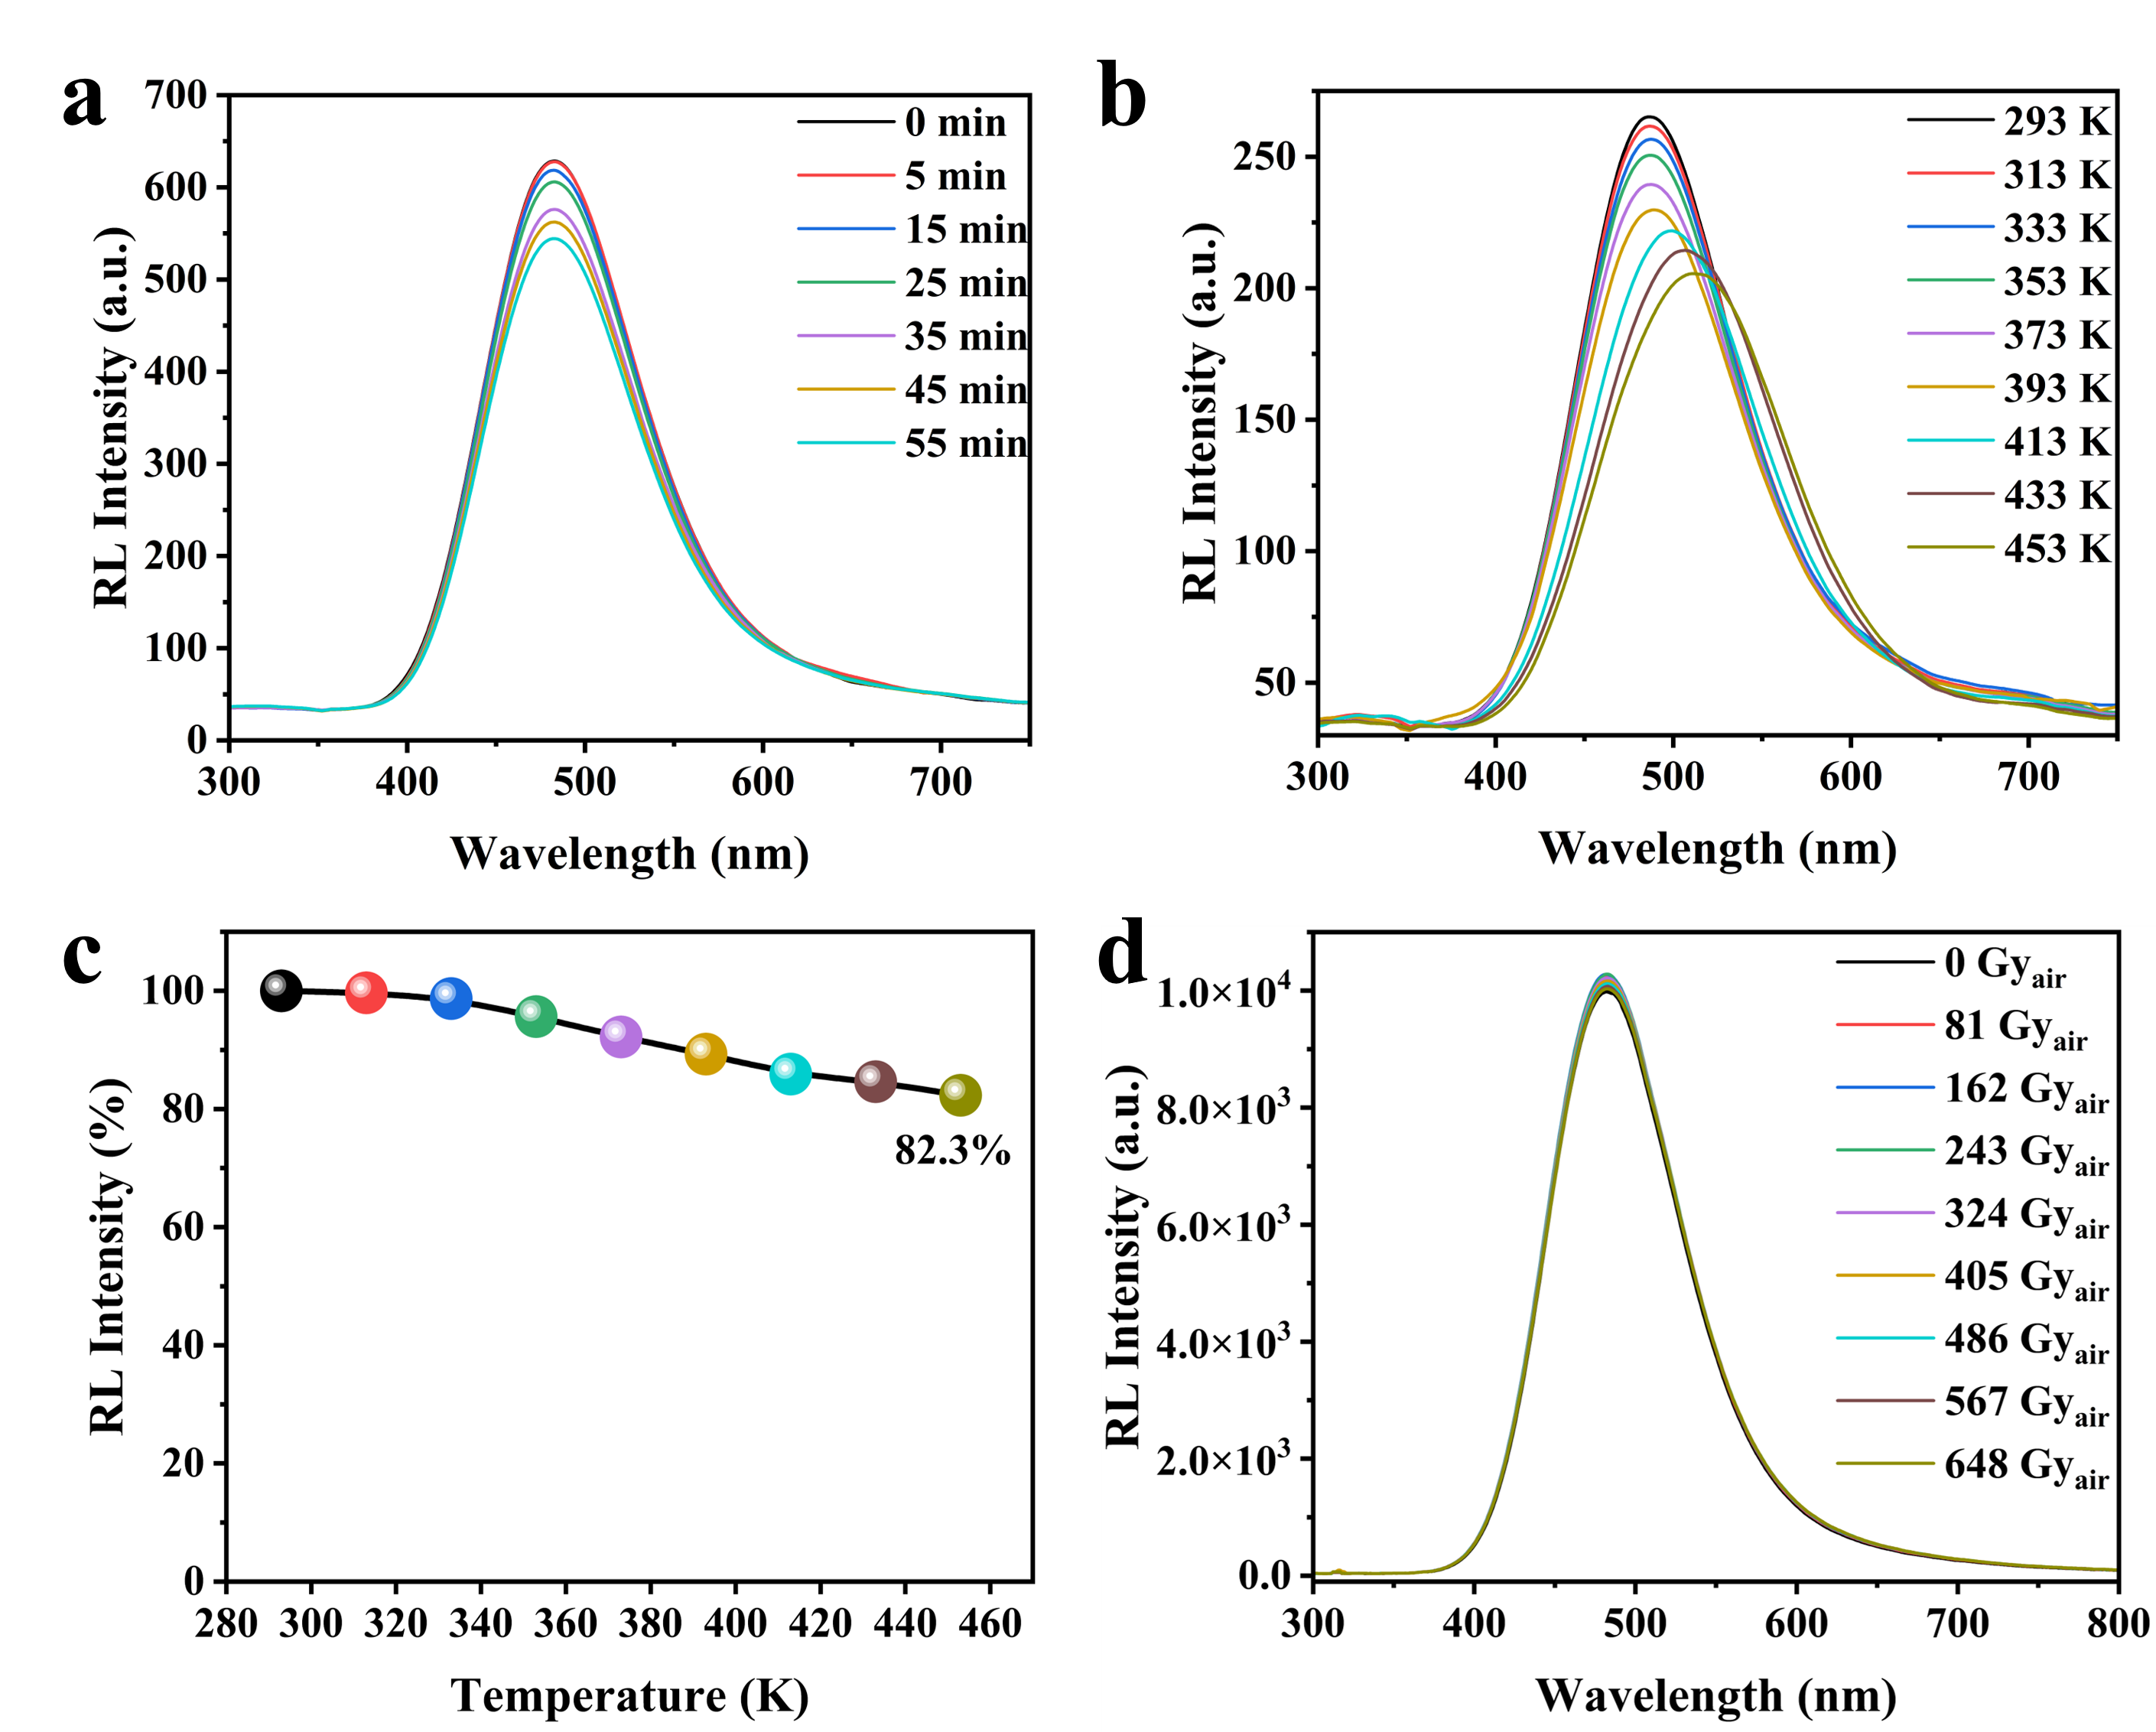


**Figure S8.** (a) RL spectra of SAC-Cs5Cu3Cl6I2@PDMS films placed in water. We put the Cs5Cu3Cl6I2@PDMS film in the water and turned on the X-rays, it exhibited excellent blue-emitting as usual. After 55 min, we took it out of the water, and it remained the excellent scintillation properties; (b) The temperature-dependent RL spectra of SAC Cs5Cu3Cl6I2and (c) corresponding RL emission intensity versus T. The SAC Cs5Cu3Cl6I2 was heated from 293 K to 453 K on the hot table, and we tested the scintillation properties under the X-ray (dose rate:4.06 mGyair s-1). The RL intensity decreased slightly with the temperature rising. Even at 453 K, it still possessed remarkable scintillation properties, performing the excellent scintillation property against heat; (d)RL spectra of SAC Cs5Cu3Cl6I2@PDMS films under continuous X-ray irradiation with a dose rate of 45 mGyair s-1. SAC Cs5Cu3Cl6I2@PDMS film was put under the X-rays and we recorded the data once every 30 min. After an exposure of a total X-ray dose of 648 Gyair, there was no obvious decrease in RL intensity, indicating the distinguished stability of our SAC Cs5Cu3Cl6I2 scintillator under radiation exposure.


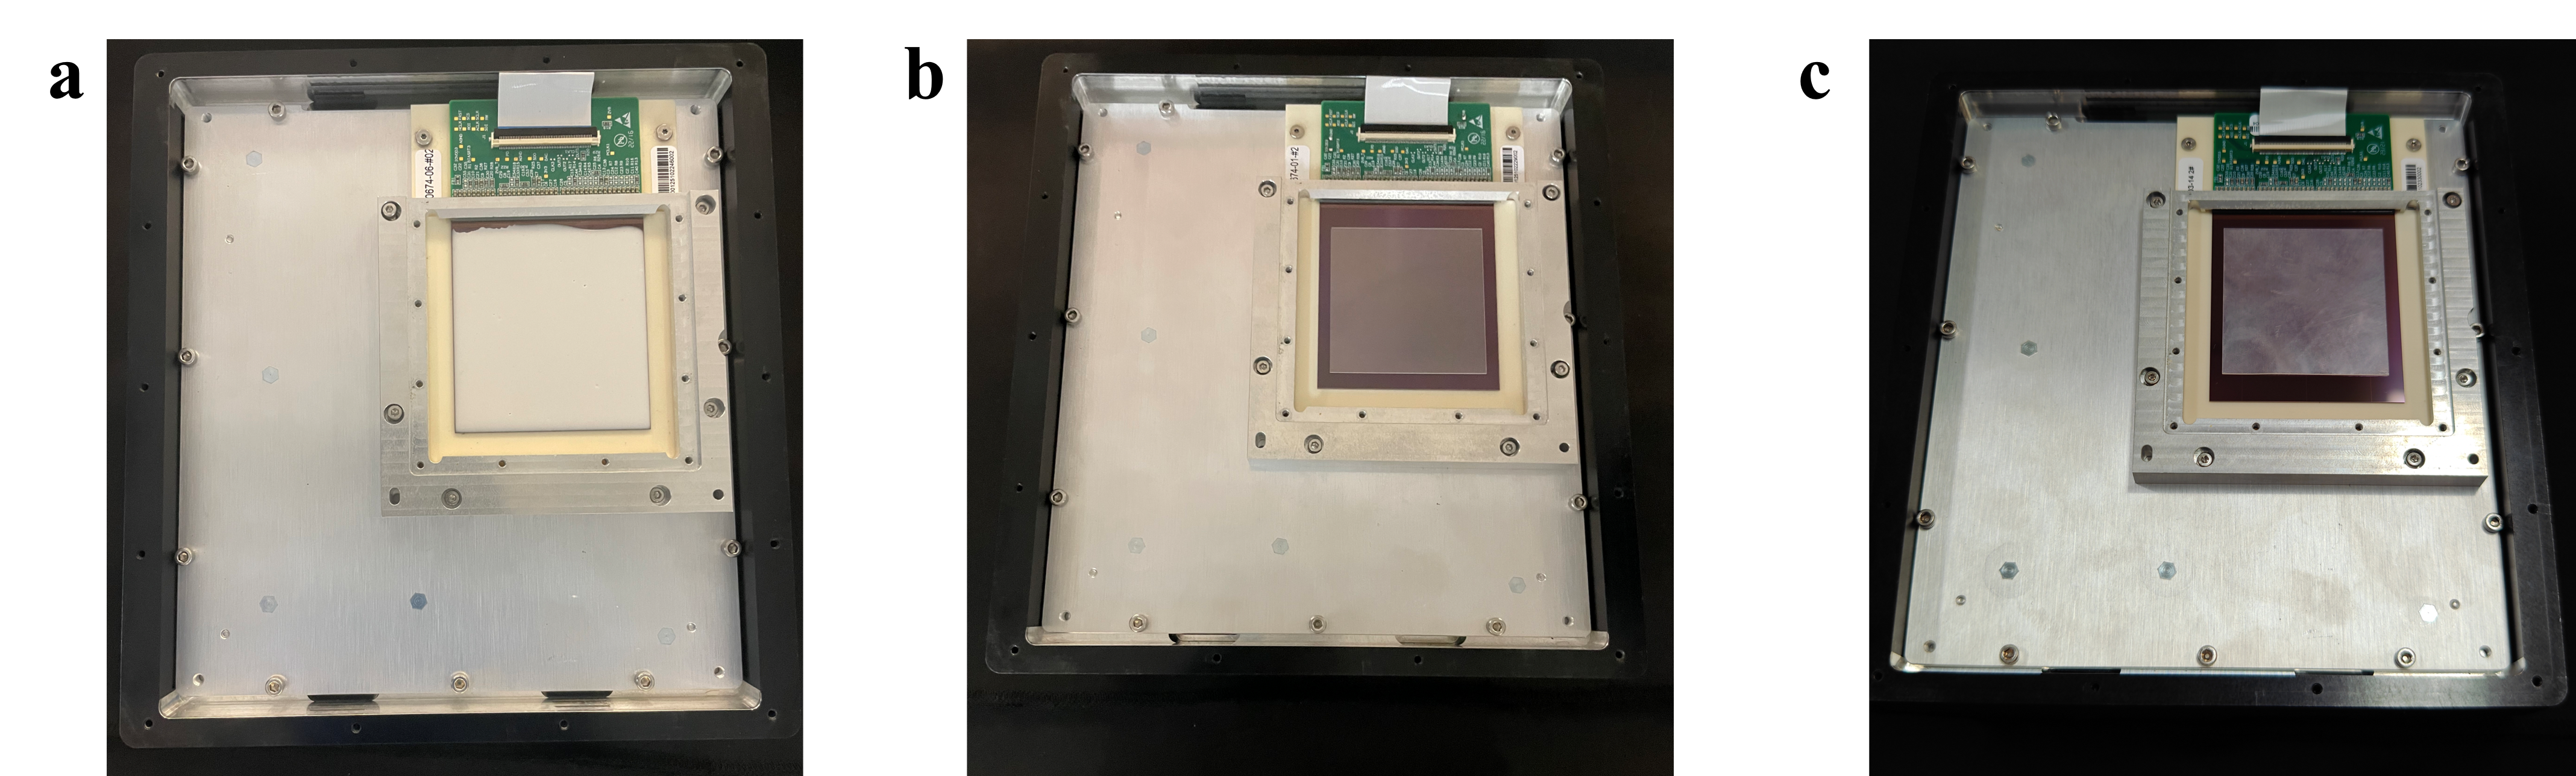


**Figure S9.** Photographs of (a) Cs5Cu3Cl6I2@PDMS, (b)LYSO:Ce, and (c) CsI:Tl X-ray imaging system. The Cs5Cu3Cl6I2@PDMS was integrated with the CMOS substrate, while LYSO:Ce and CsI:Tl scintillator were pasted on the CMOS substrate. The imagers with different way presented different imaging results. Our Cs5Cu3Cl6I2@PDMS imagers could present more distinguishable images.


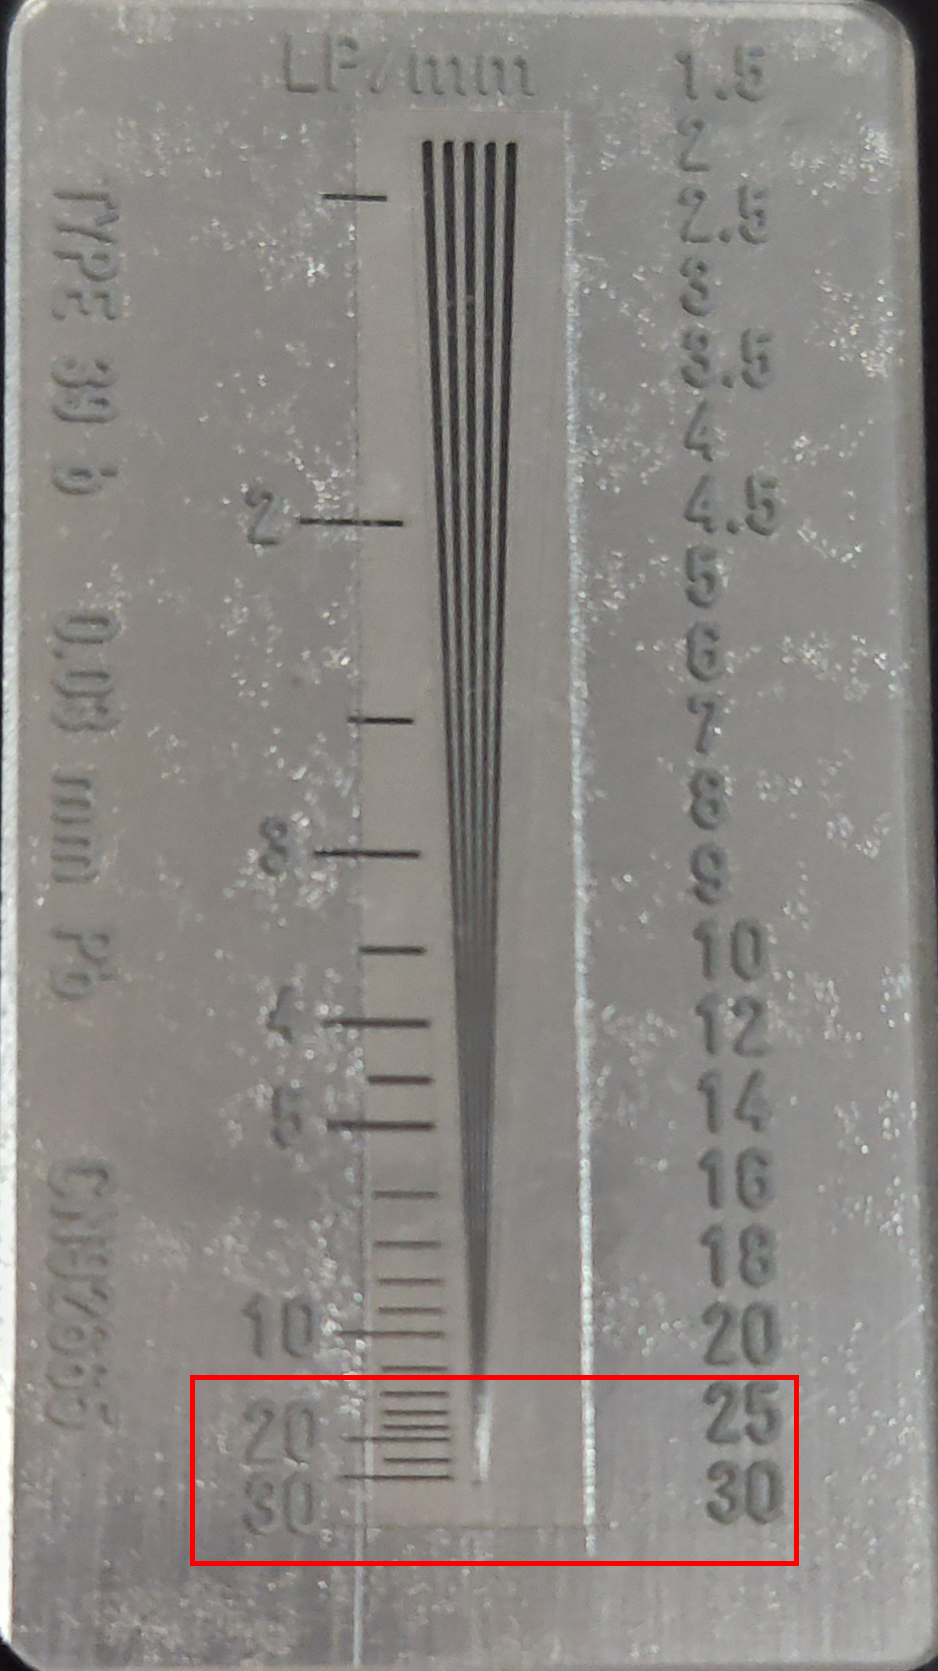


**Figure S10.** (a)Photographic images of the standard resolution pattern plate. A radiation image resolution card (Type 39b) with 30 lp mm-1 was used for the spatial resolution testing.


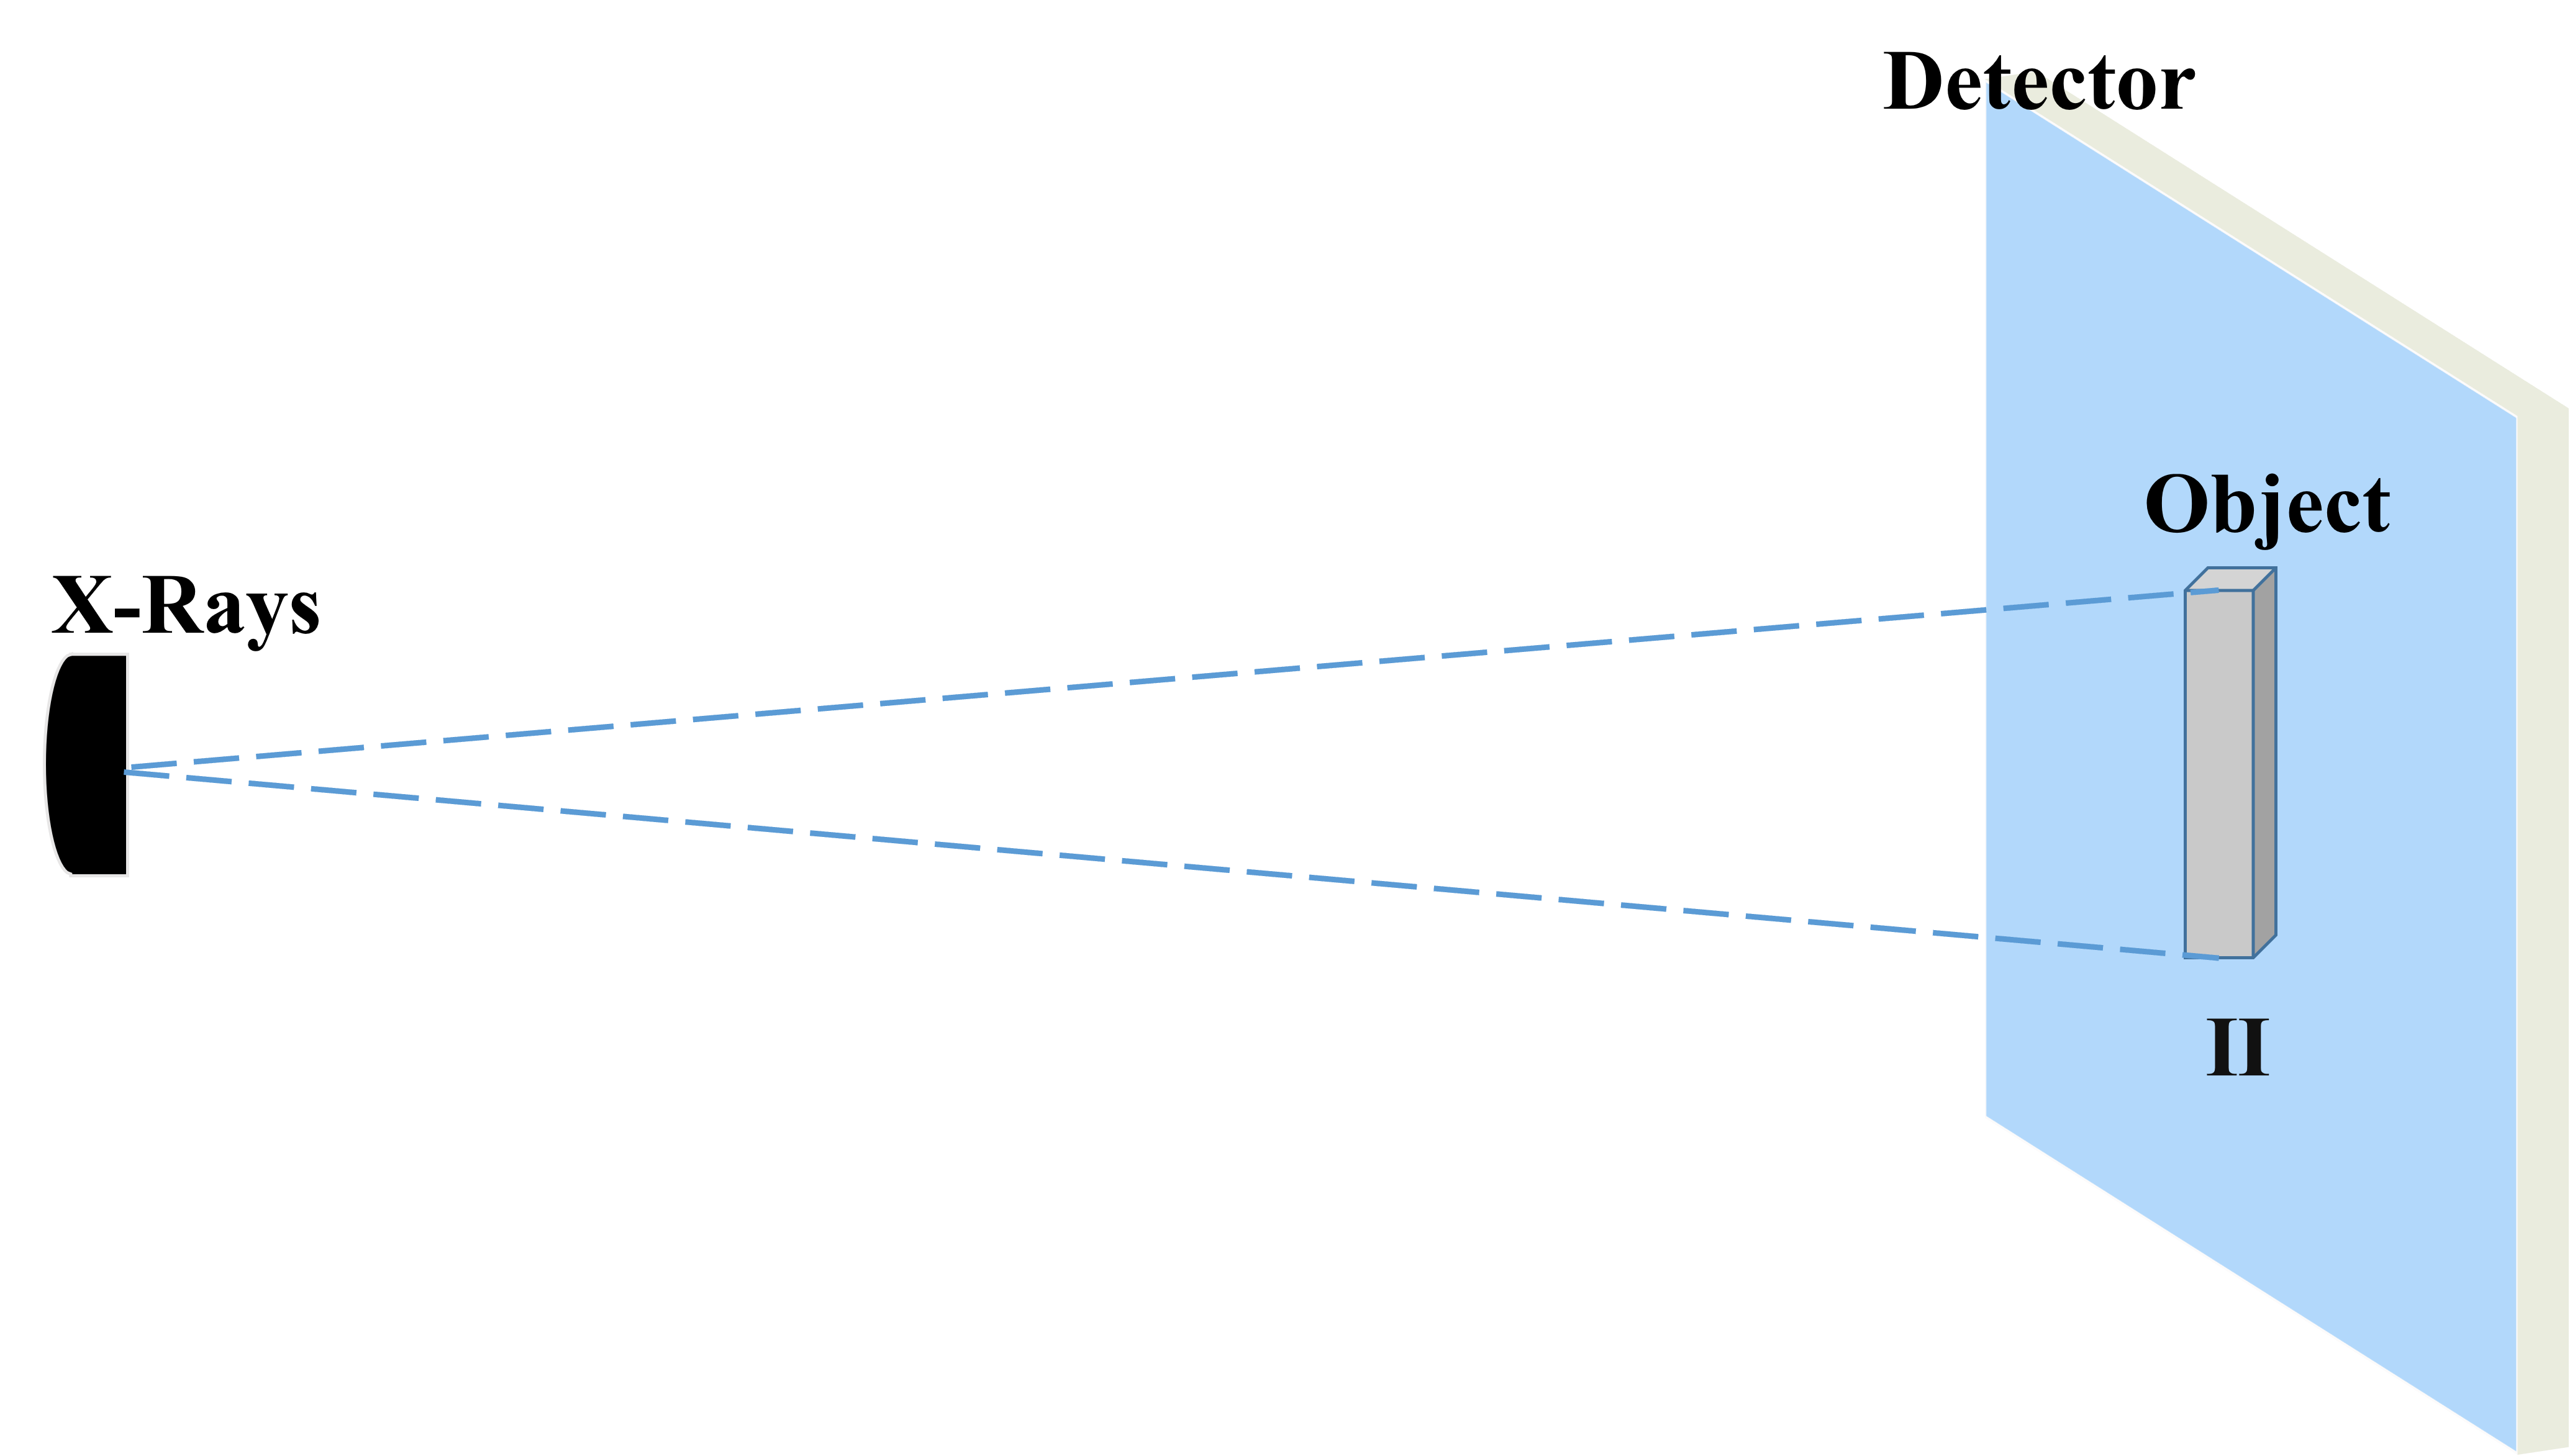


**Figure S11.** Schematic diagram of operation without optical path amplification.


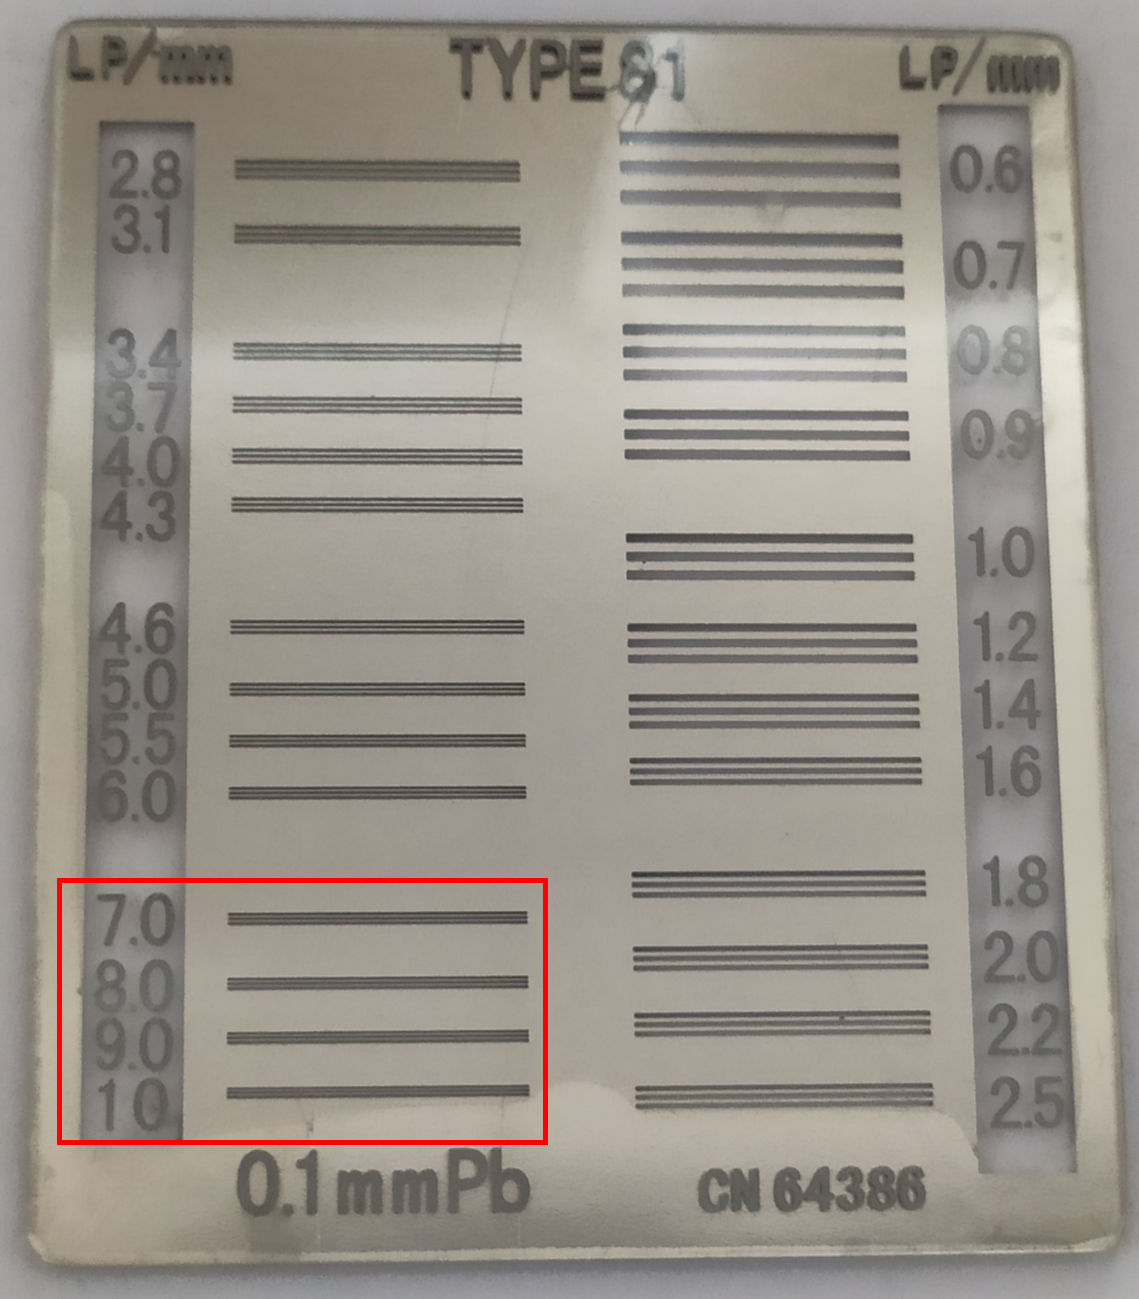


**Figure 12.** Photographic images of 10 lp mm-1 standard resolution pattern plate (Type 81) used for the spatial resolution testing.


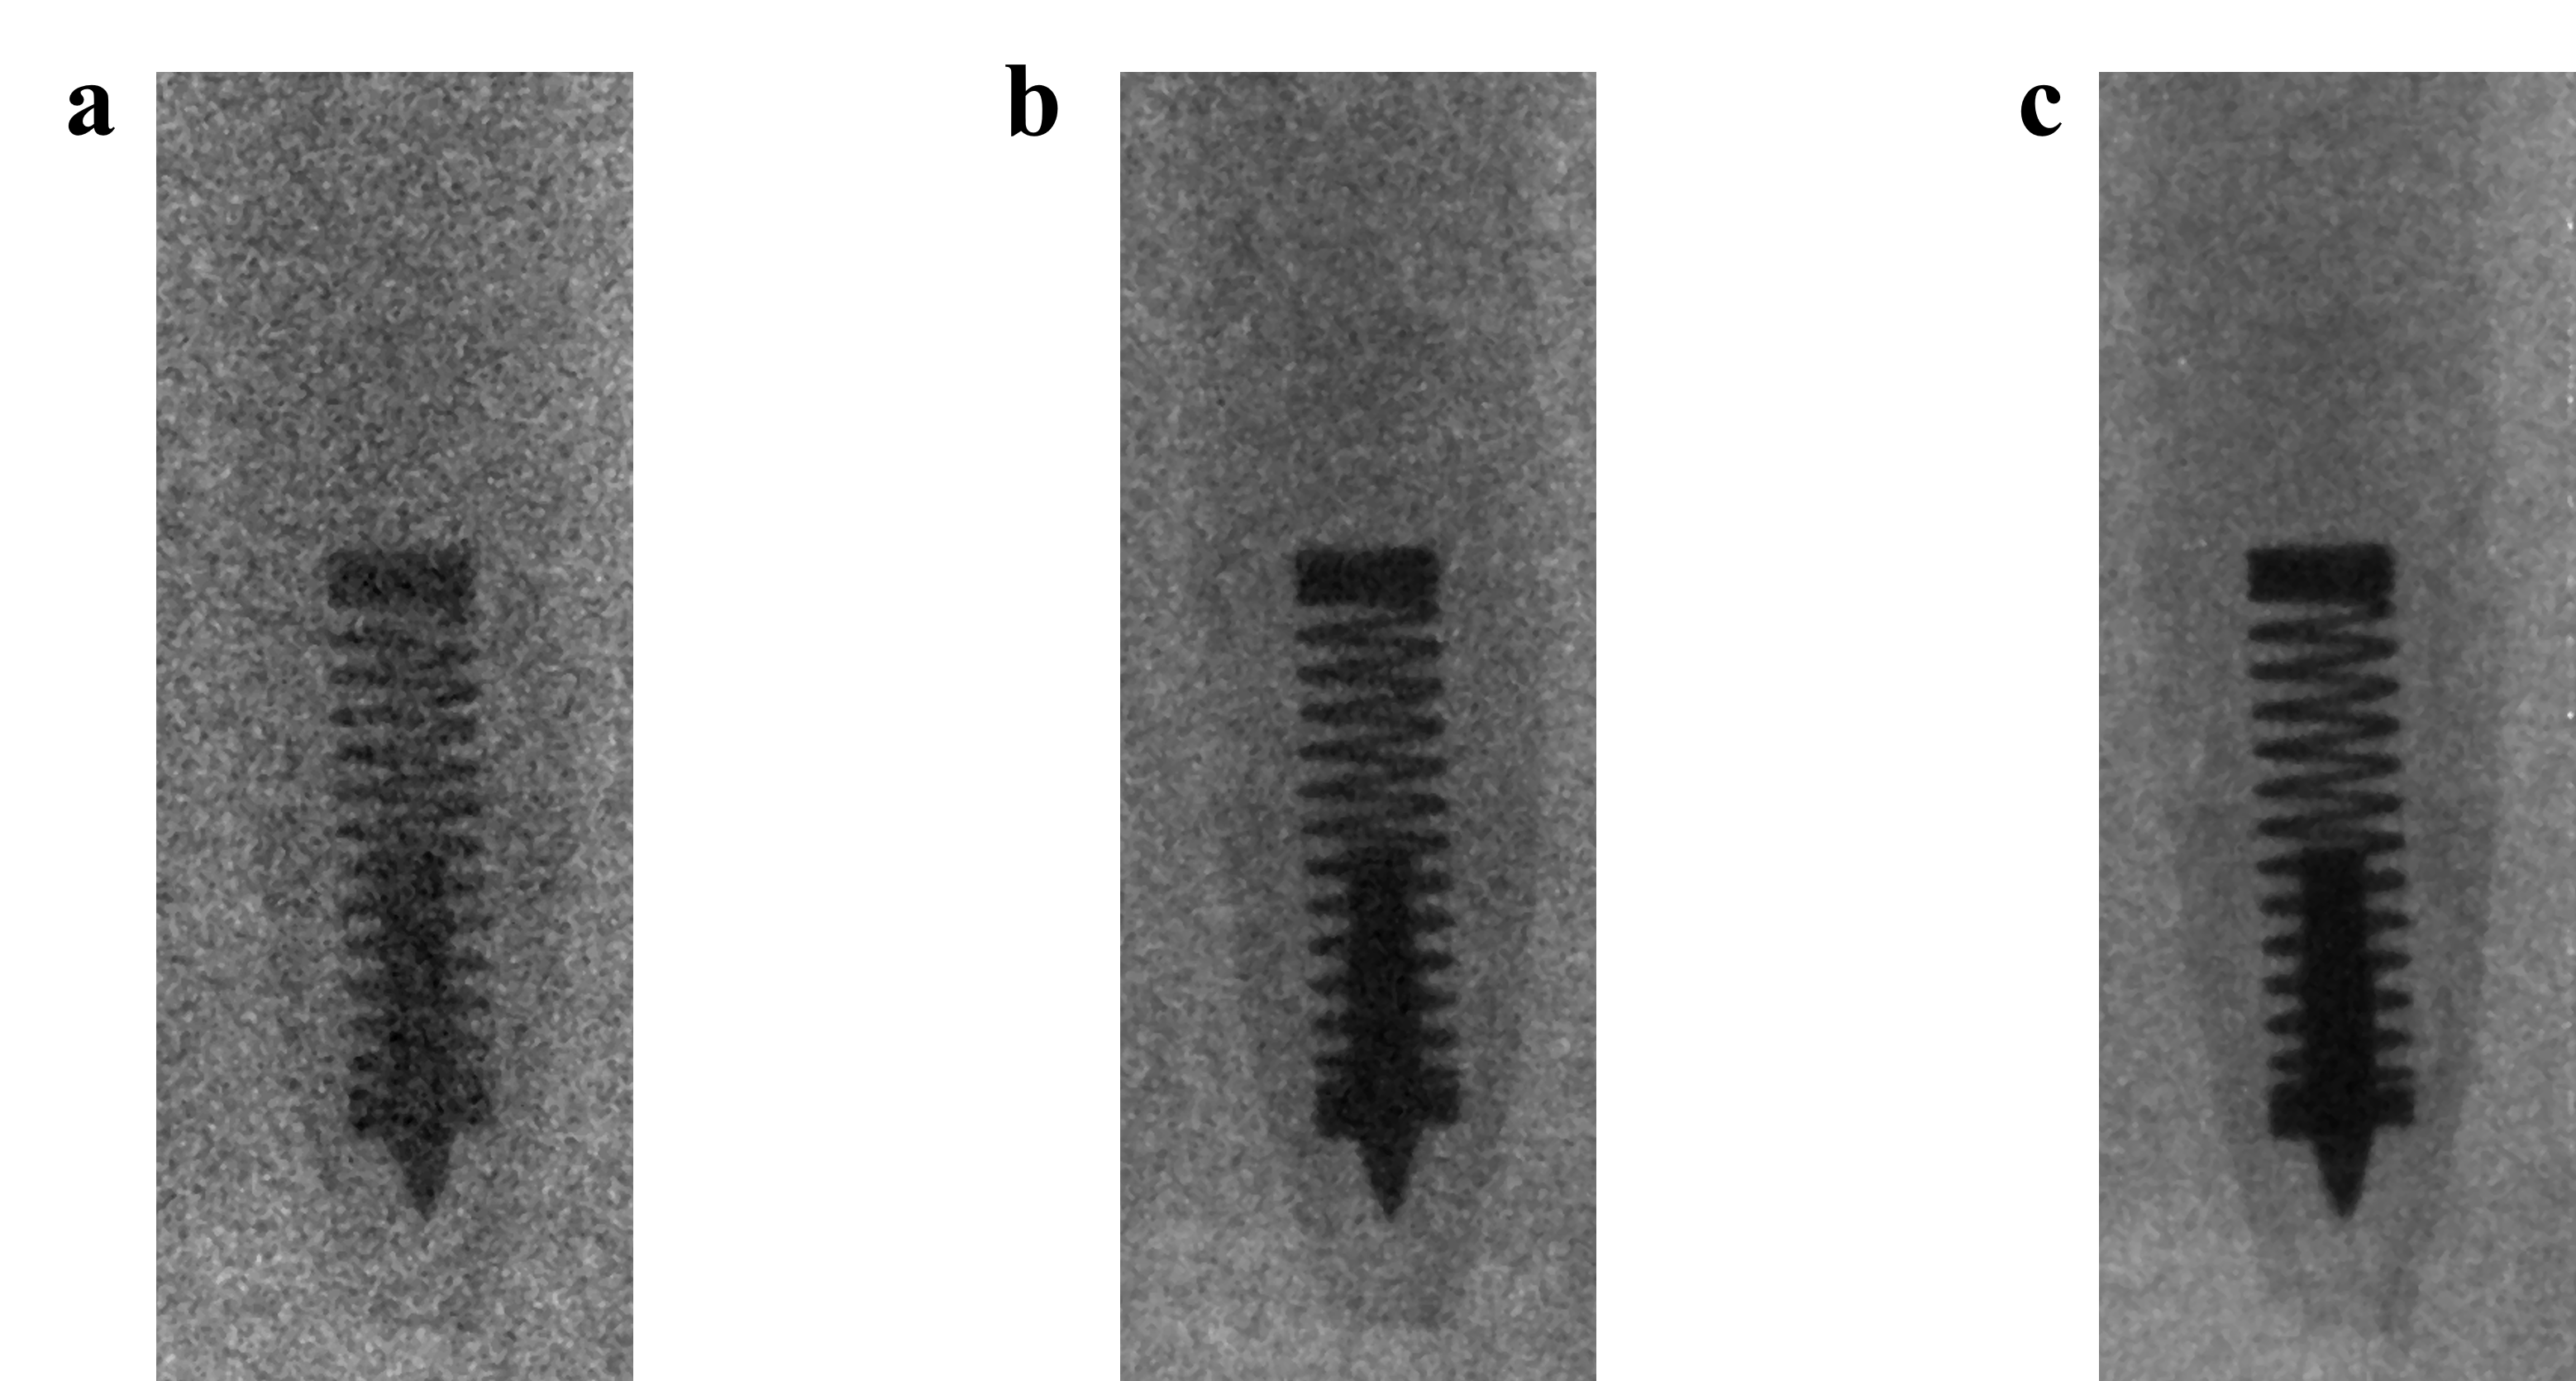


**Figure S13.** X-ray images of a roller pen under an X-ray dose of (a) 0.8 μGyair, (b) 1.0 μGyair, and (c) 2.3 μGyair from left to rightobtained by Cs5Cu3Cl6I2 imager. Even at a low dose of 0.8 μGyair, the details of spring in the roller pen remained distinguishable.

| **Scintillator** | **Light yield (****ph MeV-1)** | **Detection limit**  **(nGy s-1)** | **Spatial resolution**  **(lp mm-1)** | **Spatial resolution**  **(lp mm-1 @MTF=0.2)** | **Directly integrated with image sensor or not** | **Ref.** |
| --- | --- | --- | --- | --- | --- | --- |
| **Cs5Cu3Cl6I2** | **103102** | **34.9** | **＞30.0** | **39.9** | **Yes (CMOS)** | **This work** |
| Cs5Cu3Cl6I2 | 57000 | 71.9 | 9.0 | — | No (Camera) | 21 |
| Cs5Cu3Cl6I2 | 59700 | 60.9 | 18.0 | 18.0 | No (Camera) | 22 |
| Cs5Cu3Cl6I2 | 67200 | 11.0 | ＞20.0 | 27.1 | No (Camera) | 23 |
| Rb2CuBr3 | 91056 | 121.5 | — | — | — | 44 |
| Cs3Cu2I5 | 57000 | 53.0 | 12.0 | 12.0 | No (Camera) | 45 |
| Cs3Cu2I5 | 48800 | 48.6 | 17.0 | 17.0 | No (Camera) | 19 |
| Cs2AgI3:Cu | 82900 | 77.8 | 16.2 | 16.6 | No (Camera) | 46 |
| Rb2CuCl3 | 16600 | 88.5 | — | — | — | 47 |
| CsCu2I3 | 21580 | — | 5.0 | 7.5 | No (CMOS) | 48 |
| β-Cs3Cu2Cl5 | 34000 | 81.7 | — | 9.6 | No (Camera) | 43 |
| K2CuBr3 | 23806 | 132.8 | — | — | — | 49 |
| Cs2CdBr2Cl2 | 64950 | 17.8 | — | 12.3 | No (CMOS) | 50 |
| CsPbBr3 | — | 40.1 | — | 8.0 | No (CCD) | 51 |
| CsPbBr3 | 40100 | — | ~15.0 | 15.0 | No (Camera) | 52 |
| CsPbBr3 | 15800 | 120.0 | 12.5 | 12.5 | No (Camera) | 53 |
| Cs4PbBr6 | 19000 | 2248.0 | — | 15.9 | No (Camera) | 54 |
| BA2PbBr4:Mn | 85000 | 16.0 | 10.0 | 10.7 | No (CMOS) | 55 |

**Table S1.** Recent research progress of perovskite scintillator X-ray imagers.

**Table S2.** Fitting results of the TRPL spectra of SAC and grinded Cs5Cu3Cl6I2 in Figure 2c.

|  | **τ1** | **A1** | **χ2** |
| --- | --- | --- | --- |
| SAC Cs5Cu3Cl6I2 | 47.56 | 1.01 | 0.99 |
| Grinded Cs5Cu3Cl6I2 | 41.31 | 1.01 | 0.99 |
